1 **Impaired M-current in KCNQ2 Encephalopathy Evokes Dyshomeostatic Modulation of**  
2 **Excitability**

3

4

5 Dina Simkin<sup>1,2</sup>, Timothy J. Searl<sup>2</sup>, Brandon N. Piyevsky<sup>1</sup>, Marc Forrest<sup>3,4</sup>, Luis A. Williams<sup>5</sup>,  
6 Vaibhav Joshi<sup>5</sup>, Hongkang Zhang<sup>5</sup>, Steven J. Ryan<sup>5</sup>, Michael Schwake<sup>1</sup>, Gabriella L. Robertson<sup>1</sup>,  
7 Peter Penzes<sup>3,4</sup>, Linda C. Laux<sup>6</sup>, Owen B. McManus<sup>5</sup>, Graham T. Dempsey<sup>5</sup>, John J. Millichap<sup>6</sup>,  
8 Alfred. L. George, Jr.<sup>2,\*</sup> and Evangelos Kiskinis<sup>1,3,\*</sup>

9

10

11

12 <sup>1</sup>The Ken & Ruth Davee Department of Neurology, Feinberg School of Medicine, Northwestern  
13 University, Chicago, IL, USA

14 <sup>2</sup>Department of Pharmacology, Feinberg School of Medicine, Northwestern University, Chicago,  
15 IL, USA

16 <sup>3</sup>Department of Physiology, Feinberg School of Medicine, Northwestern University, Chicago, IL,  
17 USA

18 <sup>4</sup>Center for Autism and Neurodevelopment, Feinberg School of Medicine, Northwestern  
19 University, Chicago, IL, USA

20 <sup>5</sup>Q-State Biosciences, Cambridge, MA, USA

21 <sup>6</sup>Epilepsy Center and Division of Neurology, Departments of Pediatrics and Neurology, Ann &  
22 Robert H. Lurie Children's Hospital of Chicago, Feinberg School of Medicine, Northwestern  
23 University, Chicago, IL, USA

24

25

26 \*Correspondence: [al.george@northwestern.edu](mailto:al.george@northwestern.edu) and [evangelos.kiskinis@northwestern.edu](mailto:evangelos.kiskinis@northwestern.edu)

27

28

29

30

31 **Conflicts of interest:** L.A.W., V.J., H.Z., S.J.R., O.B.M. and G.T.D. are employees and  
32 shareholders at Q-State Biosciences. E.K. owns stock and is a consultant for Q-State  
33 Biosciences.

34

35 **ABSTRACT**

36 Mutations in *KCNQ2*, which encodes a pore-forming K<sup>+</sup> channel subunit responsible for  
37 neuronal M-current, cause neonatal epileptic encephalopathy, a complex disorder presenting  
38 with severe early-onset seizures and impaired neurodevelopment. The condition is exceptionally  
39 difficult to treat, partially because the effects of *KCNQ2* mutations on the development and  
40 function of human neurons are unknown. Here, we used induced pluripotent stem cells and gene  
41 editing to establish a disease model, and measured the functional properties of patient-derived  
42 neurons using electrophysiological and optical approaches. We find that while patient-derived  
43 excitatory neurons exhibit reduced M-current early, they develop intrinsic and network  
44 hyperexcitability progressively. This hyperexcitability is associated with faster action potential  
45 repolarization, larger afterhyperpolarization, and a functional enhancement of large conductance  
46 Ca<sup>2+</sup>-activated K<sup>+</sup> (BK) channels. These properties facilitate a burst-suppression firing pattern  
47 that is reminiscent of the interictal electroencephalography pattern in patients. Importantly, we  
48 were able to phenocopy these excitability features in control neurons only by chronic but not  
49 acute pharmacological inhibition of M-current. Our findings suggest that dyshomeostatic  
50 mechanisms compound *KCNQ2* loss-of-function and lead to alterations in the  
51 neurodevelopmental trajectory of patient-derived neurons. Our work has therapeutic implications  
52 in explaining why *KCNQ2* agonists are not beneficial unless started at an early disease stage.

53

54 **KEYWORDS**

55 *KCNQ2*, Kv7.2, epileptic encephalopathy, human induced pluripotent stem cells, excitatory  
56 neurons, M-current, epilepsy, dyshomeostatic and homeostatic plasticity, burst firing, disease  
57 modeling

58

59

60

61

62

63

64

65

66

## 67 INTRODUCTION

68 The *KCNQ2* gene encodes Kv7.2 (referred to here as KCNQ2), a voltage-dependent  
69 potassium (K<sup>+</sup>) channel widely distributed in central and peripheral neurons. In most mature  
70 neurons, KCNQ2 and the paralogous KCNQ3 protein form heterotetramers (KCNQ2/3) (1).  
71 Together these channels mediate the M-current, a slowly activating and non-inactivating voltage-  
72 dependent K<sup>+</sup> conductance suppressed by Gq protein-coupled muscarinic acetylcholine receptor  
73 activation (2). The M-current activates as neurons approach action potential (AP) threshold and  
74 acts to dampen neuronal excitability (2,3). Therefore, KCNQ2/3 channels help set the AP  
75 threshold, and also contribute to the post-burst afterhyperpolarization (AHP), which limits  
76 repetitive firing following bursts of action potentials (4,5). These channels are enriched at the  
77 axon initial segment (AIS) and nodes of Ranvier of central and peripheral neurons (6-9), and are  
78 also expressed at lower densities at the soma, dendrites and synaptic terminals (8,10,11).

79 The importance of KCNQ2 in normal brain development and function is underscored by  
80 genetic epilepsies associated with this channel. Disorders caused by *KCNQ2* mutation include  
81 benign familial neonatal seizures (BFNS) characterized by seizures that spontaneously remit  
82 within the first year of life (12,13), and the more severe neonatal epileptic encephalopathy (NEE),  
83 which may present as Ohtahara syndrome or infantile spasms (14-17). A ClinVar search for  
84 *KCNQ2* variants with pathogenic, likely pathogenic, conflicting interpretations and uncertain  
85 significance results in 552 different variants some of which are recurrent in multiple patients,  
86 accounting for approximately 5% of all mutations identified in genetic epilepsy (18,19) and 10%  
87 of those associated with early-onset forms of NEE (20). The main features of NEE are  
88 developmental and cognitive disabilities, and early onset of severe seizures, occurring within a  
89 few days after birth, that are refractory to antiepileptic drugs (21).

90 The earliest hypothesis to explain epilepsy associated with *KCNQ2* mutations posited that  
91 loss of KCNQ2 channel function allows for sustained membrane depolarization after a single  
92 action potential leading to increased repetitive firing within bursts in excitatory neurons (22).  
93 However, some variants associated with severe clinical phenotypes produce gain-of-function  
94 effects (23,24). Enhanced K<sup>+</sup> conductance, specifically in the AIS, could hyperpolarize the AIS  
95 membrane, decreasing steady state inactivation for sodium channels. This would increase the  
96 rate of action potential activation and action potential repolarization (25).

97 The mechanisms by which developmental expression of KCNQ2 channels impact  
98 neuronal excitability are not clear. What remains elusive is how the defects in M-current affect  
99 the electrophysiological properties of human neurons leading to impaired neurodevelopment.  
100 The use of patient-specific induced pluripotent stem cell (iPSC) technology has enabled a new

101 approach for elucidating pathogenic mechanisms of genetic disorders such as the epileptic  
102 channelopathies as it allows for the generation of otherwise inaccessible human neurons (26-  
103 28). Here, we use KCNQ2-NEE patient-specific and isogenic control iPSC-derived excitatory  
104 neurons to elucidate the dynamic functional effects of a prototypical *KCNQ2* mutation during  
105 differentiation and maturation in culture.

106

107

108

109

110

111

112

113

114

115

116

117

118

119

120

121

122

123

124

125

126

127

128

129

130

131

WITHDRAWN  
see manuscript DOI for details

## 132 RESULTS

### 133 Establishing a Human Neuron Model of KCNQ2 Epileptic Encephalopathy

134 To investigate the effects of a *KCNQ2* genetic variant in human neurons, we generated  
135 iPSC lines from a 7-year old male clinically diagnosed with *KCNQ2* NEE. The subject exhibited  
136 seizures on the first day of his life (29), and had treatment-resistant epileptic spasms, myoclonic-  
137 tonic seizures and severe developmental delay. Genetic testing identified a *de novo* *KCNQ2*  
138 variant (c.821C>T) resulting in a threonine to methionine missense mutation at position 274  
139 (p.Thr274Met; T274M). The threonine residue is highly conserved and located in the pore domain  
140 of the protein (Figure 1A). This prototypical mutation has been identified in at least 5 individuals  
141 diagnosed with NEE (ClinVar).

142 We generated iPSCs from peripheral blood mononuclear cells (PBMCs) using integration-  
143 free, Sendai virus-mediated reprogramming. The resulting iPSCs exhibited a normal male  
144 karyotype, typical stem cell morphology, and expressed pluripotency markers, including nuclear  
145 NANOG and the cell surface antigen SSEA4 (Supplementary Figure 1, A and B). We validated  
146 the presence of the heterozygous mutation in the patient iPSCs by targeted PCR and Sanger  
147 sequencing (Q2-01<sup>T274M/+</sup>; Figure 1B). To create a model that would allow us to attribute any  
148 phenotypic differences to the disease-associated genetic variant, we generated an isogenic  
149 control iPSC line from the patient-derived line. We specifically corrected the mutant allele using  
150 CRISPR/Cas9 genome editing and simultaneously introduced a silent mutation in the PAM site  
151 to prevent re-cleavage (Supplementary Figure 1C). We identified a corrected isogenic clonal cell  
152 line (Q2-01<sup>+/+</sup>) that exhibited a normal karyotype (Figure 1B and Supplementary Figure 1B), and  
153 found no evidence for off-target edits in any of the top 8 genomic regions with homology to the  
154 targeted *KCNQ2* exon (Supplementary Figure 1D-E and Supplementary Table 1).

155 Given the clinical presentation of *KCNQ2*-associated NEE and the focal source of seizures  
156 that reside in the cortex (30,31), we chose to study cortical excitatory neurons, differentiated  
157 through a modified *Nng2* overexpression protocol (Supplementary Figure 2A) (32,33). We  
158 simultaneously differentiated the Q2-01<sup>T274M/+</sup> patient line, the engineered isogenic control line,  
159 and two iPSC lines generated from unrelated, healthy, sex-matched controls (Supplementary  
160 Figure 2B) (34). Co-expression of GFP marked lentiviral-transduced cells, which were co-  
161 cultured with primary mouse glia to facilitate *in vitro* neuronal maturation. To determine the  
162 efficiency of differentiation, we used immunocytochemistry (ICC) to quantify the percentage of  
163 MAP2 and GFP positive cells (Figure 1C). Over 85% of GFP-positive cells were also MAP2-positive  
164 neurons for all iPSC lines (Figure 1C and Supplementary Figure 2C). As previously described (32)  
165 we found that these cultures expressed high levels of *vGLUT2*, *FOXP1* and *BRN2*, that are

166 characteristic of excitatory layer 2/3 cortical neurons ([Supplementary Figure 2D](#) and  
167 [Supplementary Table 2](#)).

168 Using isoform-specific primers, we detected several *KCNQ2* splice variants in the  
169 differentiated neuronal cultures by RT-qPCR ([Supplementary Figure 2E](#)). To confirm the  
170 presence of *KCNQ2* protein, we performed Western blot analysis on proteins isolated from  
171 neurons cultured for 4 weeks *in vitro*. We validated that we could detect both the wild type and  
172 the T274M mutant *KCNQ2* proteins expressed in transfected CHO cells ([Supplementary Figure](#)  
173 [2F](#)). Unexpectedly, we found that Q2-01<sup>T274M/+</sup> patient neurons exhibited significantly higher  
174 *KCNQ2* protein levels relative to their isogenic controls, suggesting a potential compensatory  
175 mechanism ([Figure 1D](#)).

176

### 177 **KCNQ2-NEE Patient Neurons Exhibit Lower M-Current**

178 Experimental evidence from *Xenopus laevis* oocytes indicated that pore mutations such  
179 as T274M can produce a dominant negative loss of channel function (35). To determine the effect  
180 of the T274M *KCNQ2* mutation in the context of human neurons, we measured the M-current in  
181 week 4 excitatory patient-derived neurons. We recorded the total steady state current in whole-  
182 cell voltage-clamp mode, and then blocked M-current by applying the selective *KCNQ2/3* blocker  
183 XE991. The remaining current was then subtracted from the baseline total current to determine  
184 M-current density during the last 100 ms of 1 second voltage steps from -60 to +30 mV from a  
185 holding potential of -70 mV ([Figure 1E](#)). *KCNQ2-NEE* patient-derived neurons exhibited a 32%  
186 reduction in total current density ( $p = 0.0005$ ) and a 58% reduction in M-current density ( $p <$   
187  $0.0001$ ), as compared to neurons derived from two healthy control iPSC lines ([Figure 1F-G](#)). The  
188 difference in total current density between controls and patient-derived neurons was equal to the  
189 difference in M-current density, indicating the absence of compensatory outward conductances  
190 that would be active at the end of the 1-second voltage steps. Importantly, correcting the T274M  
191 variant resulted in complete restoration of both total current density ( $p = 0.7282$ ), as well as M-  
192 current density ( $p = 0.9446$ ) to levels that were not significantly different from healthy control  
193 neurons ([Figure 1F-G](#)).

194

### 195 **KCNQ2-NEE Neurons Exhibit Enhanced Spontaneous Neuronal Network Activity**

196 The *KCNQ2* iPSC-based platform we developed presents an opportunity to dissect the  
197 functional consequences of chronic M-current impairment during neuronal development in  
198 culture. To assess spontaneous neuronal network activity, we used a multi-electrode array (MEA)  
199 platform and performed continuous recordings over a 3-week period (days 16-31, N = 4

200 independent differentiations, N = 40 well wide averages from 64 electrodes per well, per  
201 genotype). We plated an equal number of Q2-01<sup>T274M/+</sup> and isogenic control neurons and carefully  
202 monitored neuronal attachment throughout the time course of experiments (Figure 2A and  
203 Supplementary Figure 3A). Neuronal cultures acquired significant spontaneous activity (>10% of  
204 the electrodes active) on or after day 19.

205 As illustrated by representative spike raster plots, patient-derived neurons exhibited an  
206 enhanced spontaneous firing frequency relative to isogenic controls over time in culture (Figure  
207 2B-C). As neurons matured, the spontaneous firing frequency increased in both cell lines, but the  
208 rate of increase was more rapid in Q2-01<sup>T274M/+</sup> neurons (Figure 2C). Q2-01<sup>T274M/+</sup> neuronal  
209 cultures also had a significantly higher number of bursts, higher burst frequency, and greater  
210 number of bursting electrodes (Supplementary Figures 2D and 3B). Furthermore, their spikes  
211 were more restricted to bursts, as demonstrated by significantly higher number of spikes per  
212 burst, percentage of all spikes occurring within bursts, and interspike interval covariance as  
213 compared to isogenic controls (Figures 2C-D and Supplementary Figure 3B). There was no  
214 difference in number of active electrodes over time, although the rate at which more electrodes  
215 became active over days in culture was higher in patient-derived neurons (Figure 2C). These  
216 results indicate that Q2-01<sup>T274M/+</sup> patient-derived neurons developed greater levels of  
217 spontaneous activity and were more prone to fire in phasic bursts rather than single irregular  
218 tonic spikes compared to isogenic control neurons (Figure 2E).

219

### 220 **KCNQ2-NEE Neurons Exhibit Progressive Enhanced Intrinsic Excitability**

221 To determine if differences in firing behaviors exhibited by populations of Q2-01<sup>T274M/+</sup>  
222 neurons were driven by altered intrinsic excitability, we examined the firing frequency of large  
223 numbers of neurons using the Optopatch, a recently developed system for high-throughput, all-  
224 optical electrophysiology with single cell resolution (36-38). The combined expression of CheRiff,  
225 a blue light-activated channelrhodopsin, and QuasAr, a fluorescent voltage indicator allows for  
226 the simultaneous stimulation and recording from multiple neurons within an elaborate network  
227 (Figure 3A). Using *Synapsin 1* (SYN1)-driven expression constructs for CheRiff and QuasAr3  
228 (Figure 3A), we imaged and analyzed the firing frequency of ~3000 neurons per genotype under  
229 a blue-light illumination protocol (Figure 3B-D and Supplementary Figure 4). Day 35 neuronal  
230 cultures were monitored for 2 sec without stimulation followed by five 500 ms pulses of blue light  
231 of increasing intensity similar to a current injection step-protocol (Figure 3B). As shown in the  
232 raster plot of spike timing for each neuron (Figure 3C, top), and the average firing rate of all  
233 neurons (Figure 3C, bottom), KCNQ2-NEE patient-derived neurons exhibited a significantly

234 higher firing frequency relative to their isogenic controls across the stimulation protocol ( $p < 0.01$ ;  
235 [Figure 3D](#)). Within these populations of spiking neurons a significantly lower proportion of  
236 KCNQ2-NEE neurons responded to stimulations with a single spike (phasic spiking:  $p < 0.01$ ;  
237 [Figure 3E](#)).

238 We next validated the intrinsic hyperexcitability phenotype in KCNQ2-NEE neurons by  
239 performing whole-cell current-clamp measurements. We systematically recorded from single Q2-  
240 01<sup>T274M/+</sup> patient-derived and isogenic control GFP-positive cortical neurons at three time points  
241 in culture defined as week 3 (days 14-16), week 4 (days 22-26), and week 5 (days 32-35; [Figure](#)  
242 [4A-B](#)). As neurons matured over time in culture, the neuronal resting membrane potentials (RMP)  
243 became similarly more hyperpolarized for both genotypes, but input resistance was significantly  
244 higher ( $p = 0.0054$ ) in Q2-01<sup>T274M/+</sup> neurons only during week 3 ([Supplementary Figure 5A and](#)  
245 [Table 1](#)). The increasing action potential amplitudes for both genotypes over time indicated  
246 neuronal maturation ([Supplementary Figure 5B and Table 1](#)).

247 To assess neuronal membrane excitability, we measured the frequency of action  
248 potentials (APs) evoked by ascending somatic current injection steps (1 sec, 10 - 80pA) from a  
249 holding potential of -65mV ([Figure 4C](#)). More than 80% of both Q2-01<sup>T274M/+</sup> and isogenic control  
250 neurons produced at least one AP using this protocol, and >50% exhibited repetitive trains of  
251 APs by week 3 ([Supplementary Figure 5C](#)). Analysis of the number of APs evoked from iPSC-  
252 derived neurons during weeks 3, 4 and 5 revealed significant differences between genotypes  
253 during week 4 ( $p < 0.0001$ ) and week 5 ( $p = 0.02$ ; [Figure 4D-E](#)). Although Q2-01<sup>T274M/+</sup> neurons  
254 were able to fire significantly more APs than isogenic controls during week 4 and 5, there were  
255 no differences between the genotypes during week 3 ( $p = 0.46$ ; [Figure 4E](#)). Collectively these  
256 results suggest that Q2-01<sup>T274M/+</sup> patient-derived excitatory neurons develop robust intrinsic  
257 hyperexcitability progressively as they mature in culture.

258

### 259 **Lower M-current is Not Sufficient to Induce Hyperexcitability**

260 The lack of intrinsic hyperexcitability of Q2-01<sup>T274M/+</sup> neurons during week 3 prompted us  
261 to investigate whether M-current was abnormal at this early time point in culture. We  
262 hypothesized that KCNQ2 may not be expressed at this early time point, or that neurons were  
263 able to compensate for lower KCNQ2 channel function with other KCNQ channels (i.e. KCNQ3  
264 or KCNQ5) earlier on. To test this, we recorded total and M-current density in Q2-01<sup>T274M/+</sup> and  
265 isogenic control neurons during week 3. Similar to what we observed during week 4, both total  
266 current and M-current density in Q2-01<sup>T274M/+</sup> neurons were significantly lower (31%,  $p = 0.009$ ;  
267 and 57%,  $p < 0.001$ , respectively) than isogenic neurons during week 3 ([Supplementary Figure](#)



268 5D). This suggests that lower M-current amplitude is not sufficient for hyperexcitability at this  
269 early time point. Interestingly, we also found that the total current and M-current density in both  
270 Q2-01<sup>T274M/+</sup> and isogenic control neurons were significantly higher during week 3 than week 4 ( $p$   
271 = 0.007,  $p = 0.02$ ; [Supplementary Figure 5E](#)).

272

### 273 **KCNQ2-NEE Neurons Exhibit a Distal Shift of the AIS**

274 Recent studies have shown that pharmacological inhibition of M-current induces  
275 remarkable structural plasticity affecting neurite outgrowth and the dynamics of the axon initial  
276 segment (AIS) (39-41). To determine whether such changes occur in the context of Q2-01<sup>T274M/+</sup>  
277 patient-derived neurons, we assessed morphology in week 4 GFP+ cortical neurons ([Figure 5A](#)).  
278 As KCNQ2 channels are known to be localized in the AIS, we also characterized the AIS structure  
279 and position by immunolabelling neuronal cultures with Ankyrin G (ANK3), a marker of the AIS,  
280 together with the dendritic marker MAP2 ([Figure 5A-B](#)). To obtain a single measure for AIS  
281 location, we determined the AIS distance as the linear path length from the base of the soma to  
282 the start of the dense expression of ANK3 and lack of MAP2 signal. While there was no  
283 differences in the soma size, number of primary branches or the total length of the AIS, we found  
284 that patient-derived neurons exhibited a distal shift of the AIS as compared to isogenic controls  
285 ( $p = 0.0242$ ;  $N = 41$ , 30 for control and patient neurons respectively; [Figure 5B](#)).

286

### 287 **KCNQ2-NEE Neurons Exhibit Enhanced AP Repolarization and Post-Burst AHP**

288 The lower M-current in Q2-01<sup>T274M/+</sup> neurons during weeks 3 and 4 ([Figure 1 and](#)  
289 [Supplementary Figure 5D](#)) does not correlate with enhanced excitability, which occurs only during  
290 and after week 4 ([Figures 2 and 4](#)). Furthermore, altered dendritic arborization and distally shifted  
291 AIS suggests the activation of homeostatic plasticity mechanisms utilized by patient-derived  
292 neurons ([Figure 5](#)). Together these results suggest that an alternative intrinsic neuronal  
293 mechanism may be responsible for patient-derived neuron hyperexcitability. To determine the  
294 source of the progressive increase in excitability in Q2-01<sup>T274M/+</sup> neurons, we examined the AP  
295 properties and post-burst AHPs at 3, 4 and 5 weeks of differentiation. We observed that Q2-  
296 01<sup>T274M/+</sup> neurons had significantly lower AP thresholds ( $p = 0.0001$ ) and faster AP repolarization  
297 with shorter AP half-widths ( $p < 0.0001$ ), and larger fAHPs ( $p < 0.0001$ ) ([Supplementary Figure](#)  
298 [6A-B](#); [Table 1](#)). Consistent with the excitability measurements ([Figure 4](#)), the significant  
299 differences in AP thresholds and repolarization were limited to weeks 4 and 5 with no difference  
300 during week 3. Lower AP thresholds and faster repolarization would allow neurons to fire more  
301 APs with less synaptic input, which may explain the enhanced excitability in Q2-01<sup>T274M/+</sup> neurons.

302 These differences in AP properties may also explain the higher tendency of patient-derived  
303 neurons to fire within bursts (Figure 2).

304 The ability of neurons to fire in bursts is limited by several conductances that turn on  
305 following a burst of APs acting to hyperpolarize the membrane potential and prevent neurons  
306 from firing more bursts. Previous studies have shown the involvement of KCNQ2 channels in the  
307 medium afterhyperpolarization (mAHP) in cortical neurons (7,42). We examined the post-burst  
308 AHP using a 50 Hz train of 25 APs evoked by 2 ms/1.4 nA current pulses. We found that Q2-  
309 01<sup>T274M/+</sup> neurons exhibited a significantly enhanced mAHP (peak of AHP) and slow post-burst  
310 AHP (sAHP; 1 second after last stimulus;  $p = 0.003$  and  $p = 0.01$ , respectively; Figure 6C-D;  
311 Table 1). These differences were only significant during weeks 4-5 but not earlier (Figure 6C-D;  
312 Table 1). Although an enhanced AHP increases the refractory latency of neurons to repolarize  
313 and be able to fire again after a burst of APs, lower AP thresholds and faster AP repolarization  
314 in Q2-01<sup>T274M/+</sup> neurons may overcome this hurdle. These findings support our MEA data showing  
315 enhanced burst firing in patient-derived neurons because the changes in AP properties would  
316 account for more APs within bursts while enhanced post-burst AHPs would dampen spontaneous  
317 firing between bursts (Figure 2).

318

### 319 **Acute Inhibition of M-current Reduces AP Repolarization and Post-Burst AHP**

320 Previous studies have shown that blocking M-current in rodent cortical excitatory neurons  
321 acutely with XE991 enhances neuronal excitability by lowering AP threshold, impairing AP  
322 repolarization and attenuating the post-burst AHP (39,43). However, our analysis of Q2-01<sup>T274M/+</sup>  
323 neurons showed that while they have lower M-current, they develop hyperexcitability through  
324 progressive enhancement of repolarization with reduced AP half-width and enhanced fAHP and  
325 post-burst AHP (Figures 1-4 and 6). We propose two potential explanations for these divergent  
326 mechanisms for hyperexcitability: either M-current inhibition in human cortical glutamatergic  
327 neurons has different effects than what was previously reported, or chronic M-current  
328 suppression leads to hyperexcitability and altered AP properties by indirect mechanisms that are  
329 different from those related to acute inhibition.

330 To test the first possibility, we interrogated the intrinsic membrane properties of week 4  
331 control excitatory neurons before and after acute treatment with 20  $\mu$ M XE991. Consistent with  
332 previous reports (39,43), XE991 significantly reduced AP threshold and AP repolarization  
333 (Supplementary Figure 6A-B and F). Furthermore, XE991 application blunted the mAHP and  
334 sAHP amplitudes in these neurons (Supplementary Figure 6C-D and F).

335 To determine the effect of acute M-current inhibition on neuronal excitability, we quantified  
336 the number of evoked APs before and after XE991 application. Acute block of M-current  
337 enhanced the ability of isogenic control neurons to fire APs only during 20, 30 and 40 pA current  
338 steps ( $p$ -value = 0.003, 0.048, 0.021 respectively;  $N = 25$  cells; [Supplementary Figure 6E](#)). This  
339 did not resemble the behavior of Q2-01<sup>T274M/+</sup> neurons, suggesting that loss of M-current alone is  
340 not sufficient for hyperexcitability. Collectively, these experiments suggest that KCNQ2-NEE  
341 patient neurons likely develop hyperexcitability progressively as a result of chronic M-current  
342 reduction and dyshomeostatic adaptation of AP properties.

343

### 344 **Chronic Inhibition of M-current in Control Neurons Phenocopies KCNQ2-NEE Neurons**

345 While changes in the AP properties of Q2-01<sup>T274M/+</sup> patient-derived neurons may explain  
346 why they are hyperexcitable during weeks 4 and 5, hyperexcitability does not correlate with loss  
347 of M-current during week 3. Furthermore, the intrinsic AP properties of Q2-01<sup>T274M/+</sup> neurons are  
348 not consistent with a pure loss of M-current but rather with a gain of another fast or Ca<sup>2+</sup>-  
349 dependent voltage-gated K<sup>+</sup> conductance that increases over time in culture. Therefore, we  
350 hypothesized that early and chronic suppression of M-current leads to adaptive enhancement of  
351 repolarization and post-burst AHP. To test this, we chronically treated isogenic control neurons  
352 with XE991 (starting on day 12 in culture; [Figure 7A](#)) and measured excitability during week 4.

353 Chronically XE991-treated control neurons exhibited lower AP threshold ( $p = 0.003$ ),  
354 enhanced repolarization (HW:  $p = 0.0002$ ; fAHP:  $p = 0.01$ ) and larger post-burst AHPs (mAHP:  
355  $p = 0.0001$ ; sAHP:  $p = 0.0008$ ) relative to untreated controls ([Figure 7B-E](#), [Supplementary Figure](#)  
356 [7A-D and Table 2](#)). The treatment also resulted in a significant increase in the number of APs  
357 evoked by current injection steps as compared to untreated isogenic control neurons ( $p < 0.0001$ ;  
358 [Figure 7F](#)). Importantly, these effects were identical to the properties of Q2-01<sup>T274M/+</sup> neurons.

359 We next monitored spontaneous neuronal network activity using MEAs and found that  
360 chronic M-current inhibition was associated with enhanced burst firing parameters such as burst  
361 duration, number of spikes/burst and percentage of all spikes fired that occurred within bursts ( $p$   
362  $< 0.0001$ ; [Figure 7G and Supplementary Figure 7E-F](#)). This experimental paradigm effectively  
363 phenocopied the electrophysiological behavior of Q2-01<sup>T274M/+</sup> neurons in control cells and  
364 suggests that the AP repolarization and post-burst AHP alterations that we identified in patient-  
365 derived neurons occur as a result of long term reduction of M-current.

366

### 367 **KCNQ2-NEE Neurons Exhibit a Dyshomeostatic Increase in BK Channel Function**

368 The development of a shorter AP half-width and larger fAHP, mAHP and sAHP by patient  
369 neurons on and after week 4, suggest an adaptive upregulation of K<sup>+</sup> conductance. While a  
370 number of different channels could be contributing to this dyshomeostatic mechanism, large  
371 conductance, Ca<sup>2+</sup>- and voltage-gated, fast-activating BK channels can participate in both the  
372 fast AP repolarization and slow Ca<sup>2+</sup>-dependent post-burst AHP (44). We therefore investigated  
373 the contribution of BK channels to the AP properties and post-burst AHP in mature patient and  
374 isogenic control iPSC-derived neurons. Addition of paxilline (20 μm), a BK channel antagonist,  
375 increased the AP threshold (Figure 8A) and reduced the fAHP after a single AP (Figure 8B) in  
376 patient neurons but not in controls. The magnitude of change of the AP threshold ( $\Delta$ Threshold:  $p$   
377 = 0.0049) and fAHP ( $\Delta$ fAHP:  $p < 0.0001$ ) was significantly larger for patient neurons compared  
378 with controls. Furthermore, paxilline treatment reduced the mAHP and sAHP of patient neurons  
379 to the level of controls with no effect in control neurons, making the magnitude of change larger  
380 for patient neurons ( $\Delta$ mAHP:  $p = 0.0017$ ;  $\Delta$ sAHP:  $p = 0.002$ ; Figure 8C). These data suggest that  
381 functional enhancement of BK channels in KCNQ2-NEE patient neurons contributes to the  
382 increase in fast-repolarizing currents and slowly-deactivating Ca<sup>2+</sup>-dependent currents.

383  
384  
385  
386  
387  
388  
389  
390  
391  
392  
393  
394  
395  
396  
397  
398  
399  
400  
401

## 402 **DISCUSSION**

403 We developed and validated a patient-derived iPSC-based model of *KCNQ2*-associated  
404 epileptic encephalopathy that provides novel insight into the mechanisms by which the  
405 dysfunction of this channel leads to progressive neuronal abnormalities. Consistent with previous  
406 reports using heterologous expression systems (35), we found that the *KCNQ2*-encoded M-  
407 current density was significantly lower in patient-derived cortical excitatory neurons. This early  
408 defect led to the progressive development of intrinsic and network hyperexcitability, as neurons  
409 matured over time in culture. Unexpectedly, this hyperexcitability was associated with faster AP  
410 repolarization and enhanced AHP, properties not previously associated with loss of M-current.  
411 Our findings suggest that *KCNQ2* dysfunction induces dyshomeostatic plasticity and alters the  
412 neurodevelopmental trajectory of patient neurons.

413 Neurons dynamically adjust the expression and functionality of ion channels as well as the  
414 structure of their processes to regulate their intrinsic excitability in response to cell autonomous  
415 defects or their external environment. For example, exposed to chronic hyperexcitability, neurons  
416 homeostatically downscale their intrinsic excitability and alter the size and location of the AIS (45-  
417 47). However, homeostatic plasticity can become maladaptive and even pathogenic in epilepsy  
418 when these processes become dysfunctional (46-52). The “acquired channelopathy” hypothesis  
419 suggests that proepileptic channel characteristics develop during or after the onset of epilepsy or  
420 excitotoxicity (53,54). However, these ideas are not mutually exclusive and likely chronic  
421 hyperexcitability or epileptic activity leads to protective homeostasis as well as epileptogenic  
422 dyshomeostatic neuronal adaptation.

423 We identified adaptive features of Q2-01<sup>T274M/+</sup> excitatory neurons that may be protective  
424 such as: a) increased *KCNQ2* protein expression to potentially compensate for loss of *KCNQ2*  
425 channel function, b) an enhanced post-burst AHP associated with longer inter-burst latency (55)  
426 and c) a shift in the AIS away from the soma. A distal shift in the AIS has been suggested to lead  
427 to an increase in the current thresholds for AP firing (45). At the same time we identified  
428 progressively acquired intrinsic AP properties that lead to a hyperexcitable phenotype in Q2-  
429 01<sup>T274M/+</sup> patient neurons despite the protective homeostatic changes. These dyshomeostatic  
430 changes include a reduction in AP threshold and faster AP repolarization. The combination of the  
431 hyperexcitable AP properties and the protectively increased post-burst AHP in single neurons  
432 result in a neuronal network burst firing pattern that has been suggested to contribute to abnormal  
433 interictal and ictal phenotypes on patient EEGs (29,56,57).

434 While it is not clear how reduced M-current in Q2-01<sup>T274M/+</sup> patient-derived neurons leads  
435 to the adaptive changes described here, we were able to recapitulate these defects by chronically

436 blocking the M-channel in control neurons. Indeed, while acute suppression of M-current evokes  
437 hyperexcitability by slowing AP repolarization and reducing the post-burst AHP, KCNQ2-NEE  
438 patient neurons and chronically treated control neurons exhibit hyperexcitability that is associated  
439 with faster repolarization and enhanced AHPs. These findings support a model where early  
440 KCNQ2 channel dysfunction drives dyshomeostatic neuronal adaptation and hyperexcitability  
441 through enhanced speed of AP repolarization and size of post-burst AHP.

442 AP repolarization and post-burst AHP are modulated by various K<sup>+</sup> channel types, and it  
443 is therefore likely that multiple conductances compound these alterations in KCNQ2-NEE patient  
444 neurons. Fast-activating and fast-inactivating K<sup>+</sup> conductances are implicated in AP  
445 repolarization while more slowly activating, slow-deactivating Ca<sup>2+</sup>-dependent K<sup>+</sup> conductances  
446 are responsible for the medium and slow AHP (58). Our voltage-clamp recordings measuring M-  
447 currents, revealed that the difference in total current density between control and patient-derived  
448 neurons was equal to the difference in M-current density. This indicated the absence of  
449 compensation for the loss of M-current by several slowly inactivating K<sup>+</sup> conductances, allowing  
450 us to eliminate these from the large list of potential culprits in the dyshomeostatically altered  
451 intrinsic properties.

452 The kinetics of fast activating BK (K<sub>Ca</sub>1.1; *KCNMA1*) channels are modulated by several  
453 β subunits enabling them to be quickly inactivated if associated with β2 (*KCNMB2*) or slowly  
454 deactivated if associated with β4 (*KCNMB4*) subunits (44,59-61). This property allows BK  
455 channels to participate in both the fast AP repolarization and slow Ca<sup>2+</sup>-dependent post-burst  
456 AHP. Our experiments with paxilline suggest that BK channels (K<sub>Ca</sub>1.1; *KCNMA1*) contribute to  
457 the increased K<sup>+</sup> conductance that enhances AP repolarization and AHPs, and leads to  
458 hyperexcitability in KCNQ2-NEE patient-derived neurons. It is also possible that other K<sup>+</sup>  
459 channels implicated in AP repolarization and post-burst AHPs, such as A-type (Kv4.x/1.4;  
460 *KCND/KCNA4*) and IK/SK (K<sub>Ca</sub>3.1/2.x; *KCNN*) channels, respectively, contribute to the changes  
461 in intrinsic excitability of KCNQ2-NEE patient-derived neurons. Interestingly, several gain-of-  
462 function mutations in K<sup>+</sup> channels have been reported in other genetic epilepsy disorders such  
463 as Kv7.5 (*KCNQ5*), BK (*KCNMA1*), Kv4.2 (*KCND2*), Kv2.1 (*KCNB1*), Kv1.2 (*KCNA2*) and K<sub>Ca</sub>4.1  
464 (*KCNT1*) channels (62).

465 Analysis of firing patterns from populations of cells using MEAs indicated that mutant  
466 *KCNQ2* patient-derived neurons developed greater levels of spontaneous activity and are more  
467 prone to fire in phasic bursts rather than single tonic spikes compared to controls. This is  
468 supported by the combination of the hyperexcitable AP properties and the protectively increased  
469 post-burst AHP in single neurons, which result in increased number of spikes per burst intermixed

470 with longer refractory periods. This burst-suppression firing pattern is reminiscent of the interictal  
471 EEG pattern on KCNQ2-NEE patients (16,29,56,57). Repeated firing of discrete groups of  
472 neurons or bursts of high-frequency action potentials is typically observed in chronic epileptic  
473 conditions (63-66). Importantly, this type of activity does not necessarily reflect more neuronal  
474 APs, but rather an alteration in the neuronal discharge pattern (i.e. bursts rather than irregular  
475 single spikes). This can lead to hypersynchronous activity during seizure episodes and a burst-  
476 suppression pattern that is characteristic on KCNQ2-NEE patient EEGs during persisting periods  
477 without seizures (16,29,56,57).

478 Treatment with an M-current activator such as retigabine (ezogabine) has been shown to  
479 be most effective when given to patients early in development (29). Our findings support this  
480 clinical observation as early intervention may interrupt the dyshomeostatic adaptation observed  
481 in patient-derived neurons. Unfortunately, because KCNQ2-NEE presents in the first days of life,  
482 targeting the underlying cause (i.e. KCNQ2 loss-of-function) might not be effective if started late  
483 in the disease course. Perhaps, targeting these dyshomeostatically altered functional features  
484 might offer an alternative therapeutic strategy for this vulnerable patient population. The iPSC-  
485 based platform that we developed here may be used to identify effective therapeutics and  
486 address further questions regarding the spatiotemporal mechanisms of NEE due to *KCNQ2*  
487 mutations.

488  
489  
490  
491  
492  
493  
494  
495  
496  
497  
498  
499  
500  
501  
502  
503  
504  
505  
506  
507

## 508 **METHODS**

509

### 510 **Cell Lines**

511 Control 1 hiPSC line (11a; RRID:CVCL\_8987) was derived previously (34). Control 2  
512 hiPSC line (NCRM-5; NHCDR Cat# ND50031, RRID:CVCL\_1E75) was obtained from the NIH  
513 Center for Regenerative Medicine (NIH CRM). KCNQ2-NEE patient and isogenic control iPSC  
514 lines were derived as described below. Further information on all iPSC lines can be found in  
515 [Supplementary Figure 2B](#).

516

### 517 **Cell Culture**

518 All iPSCs were grown on Matrigel (BD Biosciences) with mTeSR1 media (Stem Cell  
519 Technologies) and passaged weekly using 1mM EDTA or Accutase (Sigma). All cell cultures  
520 were maintained at 37°C and 5% CO<sub>2</sub>. All lines were determined to be mycoplasma-free.

521 Primary glial cell cultures were derived from brain cortex of postnatal day 0-2, CD-1 mice  
522 (Charles River). Briefly, brain cortices were dissected free of meninges in dissection buffer HBSS  
523 (Thermo Fisher), then digested with trypsin (Thermo Fisher) and DNase I (Worthington) for 10  
524 min at 37°C. The tissue was dissociated in glia medium: MEM (Life Technologies) supplemented  
525 with Glutamax (0.6%), D-glucose, 10% normal horse serum (Life Technologies), and penicillin-  
526 streptomycin (Thermo Fisher). After centrifugation and resuspension, cells were filtered through  
527 a 0.45 micron cell strainer and plated on poly-D-lysine coated plates with glia media at 37°C, 5%  
528 CO<sub>2</sub> for 2 weeks. Afterwards, glial cultures were tested for mycoplasma, dissociated for  
529 expansion, and frozen in 10% DMSO/horse serum. All animal experiments were approved and  
530 conducted in accordance with the policies and guidelines set forth by the Northwestern University  
531 Institutional Animal Care and Use Committee (IACUC).

532

### 533 **Generation of iPSCs**

534 Peripheral blood mononuclear cells (PBMCs) were isolated from a whole cell blood draw  
535 following informed consent under protocols approved both by Ann & Robert H. Lurie Children's  
536 Hospital of Chicago and Northwestern University. Reprogramming of PBMCs into iPSCs was  
537 performed at the Northwestern Stem Cell Core Facility using Invitrogen's CytoTune®-iPS 2.0  
538 Sendai Reprogramming system (A16517, ThermoFisher), following the manufacturer's  
539 instructions. This reprogramming system uses four transcription factors (Oct4, Sox2, Klf4, c-  
540 Myc). Briefly, PBMCs ( $5 \times 10^5$ ) were seeded into one well of a 24-well plate and cultured for four  
541 days in StemSpan™ SFEM II PBMC complete medium (STEMCELL Technology, 09655)  
542 supplemented with 100 ng/ml SCF (PeproTech, 300-07), 100 ng/ml FLT3 (PeproTech, 300-19),



543 20 ng/ml IL-3 (PeproTech, 200–03) and 20 ng/ml IL-6 (PeproTech, 200–06). Immediately after  
544 plating, the cells were infected with Sendai virus for 48 h at 37 °C. The infected cells were  
545 transferred onto MEF feeders and cultured in StemSpan™ SFEM II. Following 21–28 days of  
546 culture, individual iPS colonies were picked and transferred to matrigel coated 6 well plate for  
547 expansion and were maintained in mTeSR1.

548

### 549 **CRISPR/Cas9 Gene-Editing**

550 Isogenic control iPSCs were generated using CRISPR/Cas9 from the Q2-01<sup>T274M/+</sup> patient-  
551 derived iPSC line in collaboration with Applied StemCell (Milpitas, CA). Briefly, iPSCs were co-  
552 transfected with a plasmid encoding Cas9 nuclease along with the single guide RNA (sgRNA)  
553 KCNQ2.g2 (Supplementary Table 1), a puromycin-resistance plasmid, and a donor single  
554 stranded repair oligonucleotide (Supplementary Table 1). Cells were grown in the presence of  
555 puromycin for two days then colonies were isolated and expanded two weeks later. Clones with  
556 the desired genetic modification were identified by PCR genotyping and confirmed by DNA  
557 sequencing (Supplementary Figure 1C). All primer sequences can be found in Supplementary  
558 Table 1.

559

### 560 **Analysis of Off-Target Cas9 Sites**

561 Potential off-target sites were identified with the online tool: <http://crispr.mit.edu>. We  
562 selected the top 8 genomic regions of homology and thus most likely off-target sites, and  
563 amplified each one by targeted PCR of genomic DNA from the corrected iPSC clone, for further  
564 analysis either by Sanger Sequencing or by a T7 Endonuclease assay (Supplementary Figure  
565 1D-E; Supplementary Table 1). The same PCR conditions were used to amplify the positive  
566 control DNA template and primer mix, included in the Genecopoeia™ T7 Endonuclease I Assay  
567 Kit. The amplified DNA from each potential off-target site was purified using the Wizard® SV Gel  
568 and PCR Clean-Up System (Promega). The concentration of the purified DNA from the potential  
569 off-target sites and the template DNA from the positive control was assessed by using a  
570 Nanodrop 2000 Spectrophotometer (Thermo-Fisher). 500 ng of DNA product from each potential  
571 off-target region of the isogenic and parental cell lines and 500 ng of the positive control DNA  
572 template were heated to 95°C for five minutes and subsequently allowed to cool to room  
573 temperature to denature and re-anneal the PCR products. 2U of T7 Endonuclease I  
574 (Genecopoeia) was added to the re-annealed PCR products and incubated at 37°C for 60  
575 minutes. The PCR products from the potential off-target sites and the positive control template

576 were then run on a gel with 6x loading buffer, alongside a 2-log DNA ladder (New England  
577 BioLabs Inc.). All primers sequence can be in [Supplementary Table 1](#).

578

### 579 **Cortical Excitatory Neuron Differentiation**

580 iPSCs were differentiated into glutamatergic neurons using a modified version of a  
581 protocol based on *Ngn2* overexpression (32). Stem cells were dissociated as single cells using  
582 Accutase (Sigma), re-suspended in mTeSR1 with 10 $\mu$ M ROCK inhibitor (Y-27632, DNSK  
583 International), then incubated with lentiviruses (pLV-hPGK-M2rtTA, TetO-Ngn2-Puro, TetO-  
584 FUW-EGFP) in suspension for 5-10 min before plating (95,000 cells/cm<sup>2</sup>; [Supplementary Figure](#)  
585 [2A](#)). After 24h (day 1), lentivirus was removed and replaced with knockout serum replacement  
586 medium (KOSR) consisting of KnockOut DMEM supplemented with Knockout replacement  
587 serum KSR, nonessential amino acids (NEAA), Glutamax (Life Technologies), 55 $\mu$ M  $\beta$ -  
588 mercaptoethanol (Gibco, Cat# 21985023), 10 $\mu$ M SB431542 (DNSK International), 100nM LDN-  
589 193189 (DNSK International), 2 $\mu$ M XAV939 (DNSK International) and 2  $\mu$ g/ml of doxycycline  
590 (Sigma). On the following day (Day 2), media was replaced with a 1:1 ratio of KOSR to neural  
591 induction media (NIM) composed of DMEM:F12 supplemented with NEAA, Glutamax, N2 (Gibco,  
592 Life Technologies), 0.16% D-glucose (Sigma) and 2 $\mu$ g/ml heparin sulfate (Sigma). Doxycycline  
593 (2 $\mu$ g/ml) and puromycin (2 $\mu$ g/ml; Sigma) were added to this NIM media. On Day 3, the media  
594 was replaced with NIM containing doxycycline (2 $\mu$ g/ml) and puromycin (2 $\mu$ g/ml). All neurons were  
595 frozen in 10% DMSO/FBS on Day 4 ([Supplementary Figure 2](#)). For all experimental analysis,  
596 iPSC-derived neurons were plated on primary CD1 mouse cortical glia, derived as previously  
597 described (67). Glial cells were first plated on PDL/laminin-coated plates or coverslips in glia  
598 media composed of MEM (Life Technologies) supplemented with Glutamax (0.6%), D-glucose,  
599 and 10% Horse serum (Life Technologies). After 5-7 days, neurons were thawed (Day 5 post-  
600 induction) and plated, at a density of 20,000/cm<sup>2</sup>, directly onto the monolayer of mouse glia in  
601 Neurobasal medium (NBM), supplemented with NEAA, Glutamax, N2 and B27 (Life  
602 Technologies) containing BDNF (10ng/mL, R&D systems), 2% FBS (VWR), doxycycline and  
603 ROCK inhibitor. Half of the media was replaced every other day.

604

### 605 **Preparation of Plasmids and Lentivirus**

606 Overexpression of KCNQ2 in CHO cells for Western blotting was achieved using a plasmid  
607 containing wild type KCNQ2-IRES2-EGFP that was a gift from David McKinnon (68). Two base  
608 pairs were modified through mutagenesis, in this plasmid (c.2002G>A, p.K668E; c.2467T>C,

609 p.R823C), to match NM\_172108.4 sequence. Mutagenesis was performed to insert the T274M  
610 patient mutation into the wildtype construct.

611 TetO-Ngn2-puro (Addgene plasmid #52047) and TetO-FUW-EGFP (Addgene plasmid  
612 #30130) plasmids were gifts from Marius Wernig (32,69). FUW-M2rtTA was a gift from Rudolf  
613 Jaenisch (Addgene plasmid # 20342) (70). Lentiviruses were generated in HEK293T cells using  
614 the second generation packaging vectors, psPAX2 and pMD2.G, as described previously (71) by  
615 the Northwestern University DNA/RNA Delivery Core.

616

### 617 **Immunocytochemistry**

618 iPSCs and neurons were plated on Matrigel or PDL/laminin-coated glass coverslips,  
619 respectively. Cells were fixed with 4% formaldehyde (Sigma) in 4% sucrose/PBS for 15 min at  
620 room temperature. Cells were permeabilized and blocked simultaneously in PBS containing 0.1%  
621 Triton and 5% normal goat serum (Jackson ImmunoResearch) for 2 hr at 4°C followed by  
622 incubation with primary antibodies overnight at 4°C. The following primary antibodies were used:  
623 GFP (Abcam ab13970, RRID: AB\_300798, 1:10,000), ankyrin-G (Neuromab 75-146,  
624 AB\_10673030, 1:200), synapsin (Cell signaling #5297, AB\_2616578, 1:200), Map2 (Millipore  
625 MAB3418, AB\_94856, 1:1000), and Map2 (AB15452, AB\_11211337, 1:1000). Cells were  
626 washed three times in PBS and incubated with secondary antibodies at room temperature for 1  
627 hour followed by another three washes in PBS. The following secondary antibodies were used:  
628 Alexa 488 goat anti-chicken, Alexa 568 goat anti-mouse, Alexa 568 goat anti-chicken, Alexa 647  
629 goat anti-rabbit, and Alexa 647 goat anti-mouse (Thermo Fisher Scientific, 1:1000). Primary and  
630 secondary antibodies were diluted in PBS containing 5% normal goat serum. Coverslips with  
631 immunostained cells were washed briefly in distilled water and mounted onto microscope slides  
632 using Prolong anti-fade reagent (Life Technologies). Neurons from the same differentiation  
633 experiment were fixed and stained at the same time with identical antibody dilutions. Images  
634 were acquired at 10x for MAP2/GFP+ neuron counting using a Leica inverted Ti microscope.

635

### 636 **Confocal Imaging and Analysis of Neuronal Morphology**

637 For morphometric analysis images of immunostained neurons were acquired using a ×63  
638 oil immersion objective lens on a Nikon C2+ confocal microscope with NIS-Elements software.  
639 Each channel was acquired sequentially to prevent fluorescence bleed-through with 2x line  
640 averaging for each channel. Neurons were imaged on multiple z-planes to capture full dendritic  
641 and axonal projections, and maximum intensity projections (max projections) of z-stacks created

642 in Image J (Fiji) were used for downstream analyses. Images were acquired using identical  
643 settings for each experiment to allow comparison between experimental groups.

644 For analysis of the AIS and soma area, thirty to forty neurons were imaged for each  
645 isogenic line (10-15 neurons from each of three independent differentiations). Regions of interest  
646 (ROI) defining the outline soma were drawn in Image J from max projections of the GFP channel.  
647 Z-stacks were consulted for cells with ambiguous somas shapes, to avoid the inclusion of any  
648 protrusions. To identify the AIS, a set threshold (>1000 mean pixel intensity) was applied to  
649 confocal images containing Ankyrin G (ANK3) immunostaining. Any signal above this threshold  
650 and devoid of MAP2 immunostaining was defined as the AIS. The AIS was traced from start to  
651 finish using the freehand line tool in Image J to determine the total AIS length. If a neuron  
652 contained multiple regions of ANK3 staining (i.e. multiple axons) the length of all ANK3+  
653 segments was summed for that cell. To determine the distance of the AIS from the soma, the  
654 shortest possible line was traced from the edge of the soma ROI to the start of the AIS, following  
655 neuronal processes. Morphometric measurements [soma area ( $\mu\text{m}^2$ ), AIS length ( $\mu\text{m}$ ), the  
656 distance of the AIS to the soma ( $\mu\text{m}$ )] were all performed in Image J and recorded in Microsoft  
657 Excel. Statistical significance between two experimental groups was determined using a Student  
658 t-test (for parametric data) or Mann-Whitney (for non-parametric data). All graphs and statistics  
659 for morphometric analyses were performed in Statview.

660

### 661 **RNA Isolation and qRT-PCR**

662 Cells were harvested by scraping from 6-well plates at the indicated time points after  
663 induction of neuronal differentiation. Cells were resuspended in TRIzol Reagent (Life  
664 Technologies), and RNA was isolated following manufacturer's protocol. RNA (0.5 to 1  $\mu\text{g}$ ) was  
665 treated with DNase I (Invitrogen) and subsequently used for the generation of cDNA using  
666 iSCRIPT Reverse Transcription Supermix (Bio-Rad) following manufacturer's instructions. RT-  
667 PCR was performed using SYBR green on the CFX system (Bio-Rad). All assays were performed  
668 in triplicate. The averaged cycle of threshold (Ct) value of two housekeeping genes (*GPI/GAPDH*)  
669 was subtracted from the Ct value of the gene of interest to obtain the  $\Delta\text{Ct}$ . Relative gene  
670 expression was determined as  $2^{-\Delta\text{Ct}}$  ( $\Delta\Delta\text{Ct}$ ) and expressed relative to the control sample or the  
671 highest expressed sample in the experiment. All primer sequences are listed in [Supplementary](#)  
672 [Table 2](#).

673

### 674 **Western Blot**

675 Cells were harvested from 6-well plates at the relevant times of neuronal differentiation.  
676 Briefly, cells were twice washed with ice-cold PBS, and scraped from the wells in PBS with mini  
677 EDTA-free protease inhibitor cocktail table (Roche). Cell pellets were lysed in EBC Lysis Buffer  
678 (Boston Bio Products) with protease inhibitor cocktail on ice for one hour and spun at 14,000  
679 RPM in an Eppendorf 5417R centrifuge at 4°C for 10 minutes. The supernatant was used to  
680 perform a BCA assay. Protein samples were electrophoresed on Novex™ 4-20% Tris-Glycine  
681 gels (Thermo-Fisher) and transferred onto nitrocellulose membrane using the Criterion™ Blotter  
682 transfer system (Bio-Rad). Membranes were blocked in 5% milk in .1% Tween/Tris-buffered  
683 saline (TBST) for 30 min and probed with primary antibodies in 5% BSA-TBST with .05% sodium  
684 azide against: KCNQ2 (1:1000; custom made), GAPDH (Millipore MAB374; 1:5000) and  
685  $\beta$ Tubulin-III (BioLegend #801201, previously Covance: #MRB-435P; 1:5000) overnight at 4°C,  
686 followed by Peroxidase-AffiniPure Goat Anti-Mouse or Anti-Rabbit IgG (H+L) secondary antibody  
687 (Jackson ImmunoResearch 115-035-003 or 111-035-144, respectively; 1:10000) in 5% milk-  
688 TBST for 1hr. To visualize protein, blots were incubated with secondary antibody in 5% milk-  
689 TBST in the dark for 1 hr. Finally, blots were visualized using SuperSignal West Pico PLUS  
690 chemiluminescence (ThermoScientific) on a Bio-Rad Chemidoc using ImageLab software.

691

### 692 **Multi-Electrode Array Recordings**

693 For multielectrode array (MEA) studies, 12 well MEA plates with 64 electrodes per well  
694 were coated with PDL and laminin according to Axion Biosystems protocols. Mouse glial cells  
695 were seeded at a density of 40,000 cells/well then 30,000 neurons/well were added one week  
696 later. Every other day, half of the media was removed from each well and replaced with fresh  
697 media. Spontaneous activity was recorded using Axion Biosystems Maestro 768 channel  
698 amplifier and Axion Integrated Studios (AxIS) v2.4 software. The amplifier recorded from all  
699 channels simultaneously using a gain of 1200 $\times$  and a sampling rate of 12.5 kHz/channel. After  
700 passing the signal through a Butterworth band-pass filter (300–5000 Hz), on-line spike detection  
701 (threshold = 6 $\times$  the root-mean-square of noise on each channel) was performed with the AxIS  
702 adaptive spike detector. All recordings were conducted at 37°C in 5% CO<sub>2</sub> / 95% O<sub>2</sub>.  
703 Spontaneous network activity was recorded for 5 min each day starting on day 15 of  
704 differentiation. Active electrodes were defined as having  $\geq 1$  spikes/min. The mean firing rate (Hz),  
705 burst number, and number of spikes per burst were used as a measure of neuronal activity as  
706 this demonstrates maturity of neuronal functional properties. MEA recordings were done with 4  
707 independent differentiations. All data reflects well-wide averages, with the number of wells per  
708 condition represented by N values.

709

## 710 **Optopatch Measurements**

711 Cryo-stocks of Ngn2 neurons (preserved on day 4) differentiated from KCNQ2-NEE  
712 patient and isogenic control iPSC lines were thawed and plated at a density of 100,000 cells/cm<sup>2</sup>  
713 onto Poly-D-Lysine/Laminin pre-coated 96-well custom-made Ibidi® tissue culture dishes. Cells  
714 were co-plated with P1 primary C57BL/6 mouse cortical glial cells, at a density of 30,000  
715 cells/cm<sup>2</sup>. Primary glial cells were prepared as previously described (67). These co-cultures were  
716 maintained in complete NBM (NBM medium supplemented with 1x Gibco® N2, 1x Gibco® B27,  
717 10ng/mL BDNF (R&D), 2ug/mL Doxycycline (Sigma) and 2% Hyclone™ Fetal Bovine Serum).  
718 Cells were cultured for 30 days with complete medium exchanges every 3 days. Two weeks prior  
719 to all-optical (Optopatch) electrophysiology measurements (at Day 21), cells were transduced  
720 with lentiviral particles encoding Optopatch components CheRiff-BFP and QuasAr3-Citrine  
721 (36,72), driven by the human *Synapsin 1* promoter for neuronal-specific expression. Lentiviral  
722 preparation and transduction were carried out as previously reported (38). Cells were recorded  
723 using Optopatch imaging (36-38) on day 35 (Figure 3A). Cells were imaged in Tyrodes Buffer  
724 (10mM HEPES, 125mM NaCl, 2mM KCl, 3mM CaCl<sub>2</sub>, 1mM MgSO<sub>4</sub>, 30mM Glucose, pH 7.40) in  
725 the presence of synaptic blockers (10μM NBQX (Sigma), 25μM D-AP5 (Tocris) and 20μM  
726 Gabazine (Sigma) to block AMPA, NMDA and GABA currents, respectively) to allow for  
727 measurements of intrinsic spontaneous and evoked neuronal activity. Optopatch imaging was  
728 performed on a custom built, ultra-wide field fluorescence microscope described previously  
729 (38,73). Briefly, samples were illuminated with ~100 W/cm<sup>2</sup> 635 nm laser excitation to monitor  
730 changes in membrane potential through changes in QuasAr3 fluorescence. In order to evoke  
731 neuronal activity, a custom blue light (470nm LED) stimulus protocol was used to depolarize the  
732 cell membrane through excitation of CheRiff. The stimulus protocol consisted of 2 seconds of  
733 spontaneous activity (blue light off) followed by five 500 msec steps of increasing blue light  
734 intensity (2.45, 5.5, 14.67, 33, and 88 mW/cm<sup>2</sup>), with 500 msec of rest in between each stimulus  
735 step. Imaging data were recorded on a Hamamatsu ORCA-Flash 4.0 sCMOS camera across a  
736 4 mm x 0.5 mm field of view at a 1 kHz frame rate. Data acquisition was performed using custom  
737 control software written in MATLAB. Analysis of Optopatch data, using a custom analytics  
738 pipeline written primarily in MATLAB, was carried out as previously described<sup>4</sup>. Statistical  
739 significance/p-values were determined using the Kolmogorov-Smirnov statistic with a custom  
740 MATLAB routine (\*\* or \*\*\* indicates p<0.01 and p<0.005, respectively). All reported error bars  
741 are standard error of the mean.

742

## 743 **Patch Clamp Electrophysiology**

744 Whole-cell voltage and current clamp recordings were made from visually identified GFP-  
745 expressing neurons using an inverted Olympus IX51 microscope equipped with a 40X objective.  
746 Recording pipettes were made of glass capillaries using a horizontal Sutter P-1000 puller yielding  
747 a 3-5M $\Omega$  resistance pipette when filled with standard intracellular solution containing (in mM):  
748 120 K-MeSO<sub>4</sub>, 10 KCl, 10 HEPES, 10 Na<sub>2</sub>-phosphocreatine, 4 Mg-ATP, 0.4 Na<sub>3</sub>-GTP, pH 7.3  
749 adjusted with KOH; osmolality 285-290 mOsm/Kg. Neurons were continuously perfused with  
750 oxygenated aCSF bath solution (in mM): 125 NaCl, 26 NaHCO<sub>3</sub>, 2.5 KCl, 1.25 NaH<sub>2</sub>PO<sub>4</sub>, 1  
751 MgSO<sub>4</sub>, 25 glucose, 2 CaCl<sub>2</sub>, pH 7.4 at 33-35°C. Whole-cell voltage clamp recordings were  
752 acquired using an Axopatch 200B amplifier (Molecular Devices, USA). An M-current blocker,  
753 XE991 (20 $\mu$ M, Abcam), was applied 2-3 minutes after establishing the whole cell configuration,  
754 and XE991-insensitive currents recorded 10 minutes after application were subtracted offline. M-  
755 currents were measured in the final 100ms of the voltage steps (Figure 1F-G).

756 Current-clamp recordings were acquired using a Multiclamp 700B amplifier (Molecular  
757 Devices, USA) and digitized at 10kHz (filtered at 3kHz) with the neurons held at -65mV ( $V_h$ ). All  
758 reported potential values were corrected for the liquid junction potential, calculated to be -8.4  
759 mV. Resting membrane potential was measured immediately after establishing the whole-cell  
760 patch clamp configuration. Input resistance ( $R_N$ ) was calculated as the slope of the voltage-  
761 current curve determined using 500 ms current steps from -50 pA to 30 pA in 10 pA steps.  
762 Medium (mAHP) and slow (sAHP) afterhyperpolarizations (AHPs) were measured as the  
763 difference between  $V_h$  and the negative going peak and 1 sec after the offset of the last current  
764 step, respectively, induced by a 50 Hz train of 25 APs evoked by 2 ms/1.2 nA current injection  
765 pulses. Single AP properties, including fast afterhyperpolarization (fAHP), were measured using  
766 direct somatic current injection ramps (10–80 pA, 500 ms). AP amplitude was calculated as the  
767 difference between  $V_h$  to the peak of the first AP of the ramp protocol. AP threshold was  
768 calculated where the first derivative of the up phase of the trace equaled 5mV/ms. Using a 1 ms  
769 sliding average, the fAHP measurement was taken when the mean first derivative of the trace  
770 reached  $0.0 \pm 0.5$  after initial spike in each sweep. AP width measurements were taken at half  
771 the AP peak amplitude relative to  $V_h$ . Accommodation was measured during 1000 ms current  
772 steps from 10 to 80 pA; the total number of APs during the entire steps were counted. Neurons  
773 meeting the following criteria were used: series resistance ( $R_S$ ) < 30 M $\Omega$ , membrane resistance  
774 ( $R_N$ ) > 200 M $\Omega$ , resting potential ( $V_{rest}$ ) < -45 mV, and AP amplitude > 80 mV from  $V_h$ . Data were  
775 analyzed using custom MATLAB protocols. Statistical analyses were conducted using Statview.

776 We also tested the action of chronic and acute application of 1 and 20  $\mu\text{M}$  XE991  
777 (expected to block 50% and 100% of M-current, respectively) (Wang et al., 1998). 1  $\mu\text{M}$  XE991  
778 was chronically applied to neuronal culture media starting day 12 in differentiation (right before  
779 beginning of week 3 time point) and AP properties were measured on week 4. Acute application  
780 of 20  $\mu\text{M}$  XE991 or 20  $\mu\text{M}$  paxilline (Tocris) was done during week 4 and AP properties were  
781 measured before and 10 min after continuous perfusion of aCSF with XE991 or paxilline.

782

### 783 **Drugs**

784 Drugs were prepared as a stock solutions using distilled water or DMSO, then diluted to  
785 the required concentration in aCSF or culture media immediately before use. Bath-applied drugs  
786 were perfused for at least 10 min to ensure complete equilibration within the recording chamber  
787 before recording.

788

### 789 **Statistical Analysis**

790 Differences were evaluated using t-test, one-way or two-way ANOVA, repeated-measures  
791 ANOVA, and Fisher's protected least significant difference post hoc tests where appropriate. All  
792 data are reported as means  $\pm$  SEM.

793

### 794 **Study Approval**

795 Written informed consent was received from participants prior to inclusion in the study  
796 under protocols approved both by Ann & Robert H. Lurie Children's Hospital of Chicago and  
797 Northwestern University IRB (#2015-738).

798

799

800

801

802

803

804

805

806

807

808

809



## 810 **ACKNOWLEDGMENTS**

811 We would like to thank Shoai Hattori for providing and adjusting MATLAB protocols to  
812 analyze current-clamp data, Chris Thompson for help making violin plots and Jean-Marc Luc  
813 DeKeyser for help with molecular cloning. The Kiskinis lab is supported by grants from the Dravet  
814 Syndrome Foundation and the Northwestern University Clinical and Translational Institute. EK is  
815 a Les Turner ALS Center Investigator. This work was supported, in part, by the Stanley Manne  
816 Children's Research Institute and Ann & Robert H. Lurie Children's Hospital of Chicago under  
817 the Precision Medicine Strategic Research Initiative, and a gift from Davee Foundation.

818

819

## 820 **AUTHOR CONTRIBUTIONS**

821 D.S., A.L.G., and E.K. conceived the study. D.S. designed and performed experiments,  
822 analyzed and interpreted all the data presented, assembled figures and wrote the manuscript.  
823 B.N.P. and D.S. generated and maintained all iPSC and neuronal cultures. B.N.P. and G.L.R.  
824 performed quality control and qPCR experiments. T.J.S. and D.S. performed patch-clamp  
825 electrophysiological experiments. D.S. performed MEA experiments. M.F. and B.N.P. performed  
826 and analyzed immunocytochemistry and confocal imaging experiments under the supervision of  
827 P.P. M.S. performed Western blot experiments. J.J.M. and L.C.L. recruited patients for the study.  
828 L.A.W., V.J., H.Z., S.J.R., O.B.M. and G.T.D. performed and analyzed data from Optopatch  
829 experiments. A.L.G. and E.K. designed experiments, interpreted the data, provided guidance and  
830 supervision and wrote the manuscript. All authors helped to edit the manuscript.

831

832

833

834

835

836

837

838

839

840

841

842

843

## 844 REFERENCES

- 845 1. Schwake M, et al. Structural determinants of M-type KCNQ (Kv7) K<sup>+</sup> channel assembly. *J*  
846 *Neurosci.* 2006;26(14):3757-3766.
- 847 2. Brown DA, Adams PR. Muscarinic suppression of a novel voltage-sensitive K<sup>+</sup> current in a  
848 vertebrate neurone. *Nature.* 1980;283(5748):673-676.
- 849 3. Brown DA, Passmore GM. Neural KCNQ (Kv7) channels. *British journal of pharmacology.*  
850 2009;156(8):1185-1195.
- 851 4. Tzingounis AV, Nicoll RA. Contribution of KCNQ2 and KCNQ3 to the medium and slow  
852 afterhyperpolarization currents. *Proceedings of the National Academy of Sciences of the United*  
853 *States of America.* 2008;105(50):19974-19979.
- 854 5. Rogawski MA. KCNQ2/KCNQ3 K<sup>+</sup> channels and the molecular pathogenesis of epilepsy:  
855 implications for therapy. *Trends in neurosciences.* 2000;23(9):393-398.
- 856 6. Pan Z, et al. A common ankyrin-G-based mechanism retains KCNQ and NaV channels at  
857 electrically active domains of the axon. *J Neurosci.* 2006;26(10):2599-2613.
- 858 7. Battefeld A, et al. Heteromeric Kv7.2/7.3 channels differentially regulate action potential initiation  
859 and conduction in neocortical myelinated axons. *J Neurosci.* 2014;34(10):3719-3732.
- 860 8. Chung HJ, et al. Polarized axonal surface expression of neuronal KCNQ channels is mediated by  
861 multiple signals in the KCNQ2 and KCNQ3 C-terminal domains. *Proceedings of the National*  
862 *Academy of Sciences of the United States of America.* 2006;103(23):8870-8875.
- 863 9. Cooper EC. Made for "anchoring": Kv7.2/7.3 (KCNQ2/KCNQ3) channels and the modulation of  
864 neuronal excitability in vertebrate axons. *Semin Cell Dev Biol.* 2011;22(2):185-192.
- 865 10. Devaux JJ, et al. KCNQ2 is a nodal K<sup>+</sup> channel. *J Neurosci.* 2004;24(5):1236-1244.
- 866 11. Shah MM, et al. Functional significance of axonal Kv7 channels in hippocampal pyramidal  
867 neurons. *Proceedings of the National Academy of Sciences of the United States of America.*  
868 2008;105(22):7869-7874.
- 869 12. Charlier C, et al. A pore mutation in a novel KQT-like potassium channel gene in an idiopathic  
870 epilepsy family. *Nature genetics.* 1998;18(1):53-55.
- 871 13. Singh NA, et al. A novel potassium channel gene, KCNQ2, is mutated in an inherited epilepsy of  
872 newborns. *Nature genetics.* 1998;18(1):25-29.
- 873 14. Kato M, et al. Clinical spectrum of early onset epileptic encephalopathies caused by KCNQ2  
874 mutation. *Epilepsia.* 2013;54(7):1282-1287.
- 875 15. Saitsu H, et al. Whole exome sequencing identifies KCNQ2 mutations in Ohtahara syndrome.  
876 *Annals of neurology.* 2012;72(2):298-300.
- 877 16. Weckhuysen S, et al. KCNQ2 encephalopathy: emerging phenotype of a neonatal epileptic  
878 encephalopathy. *Annals of neurology.* 2012;71(1):15-25.
- 879 17. Millichap JJ, Cooper EC. KCNQ2 Potassium Channel Epileptic Encephalopathy Syndrome:  
880 Divorce of an Electro-Mechanical Couple? *Epilepsy Curr.* 2012;12(4):150-152.
- 881 18. Wang J, et al. Epilepsy-associated genes. *Seizure.* 2017;44:11-20.
- 882 19. von Deimling M, et al. Epileptic Encephalopathies-Clinical Syndromes and Pathophysiological  
883 Concepts. *Current neurology and neuroscience reports.* 2017;17(2):10.

- 884 20. Afawi Z, et al. Multiplex families with epilepsy: Success of clinical and molecular genetic  
885 characterization. *Neurology*. 2016;86(8):713-722.
- 886 21. Auvin S, et al. Current understanding and neurobiology of epileptic encephalopathies. *Neurobiol*  
887 *Dis*. 2016;92(Pt A):72-89.
- 888 22. Cooper EC, Jan LY. M-channels: neurological diseases, neuromodulation, and drug development.  
889 *Archives of neurology*. 2003;60(4):496-500.
- 890 23. Millichap JJ, et al. Infantile spasms and encephalopathy without preceding neonatal seizures  
891 caused by KCNQ2 R198Q, a gain-of-function variant. *Epilepsia*. 2017;58(1):e10-e15.
- 892 24. Mulkey SB, et al. Neonatal nonepileptic myoclonus is a prominent clinical feature of KCNQ2 gain-  
893 of-function variants R201C and R201H. *Epilepsia*. 2017;58(3):436-445.
- 894 25. Niday Z, Tzingounis AV. Potassium Channel Gain of Function in Epilepsy: An Unresolved  
895 Paradox. *Neuroscientist*. 2018;1073858418763752.
- 896 26. Ichida JK, Kiskinis E. Probing disorders of the nervous system using reprogramming approaches.  
897 *The EMBO journal*. 2015;34(11):1456-1477.
- 898 27. Tchieu J, et al. A Modular Platform for Differentiation of Human PSCs into All Major Ectodermal  
899 Lineages. *Cell Stem Cell*. 2017;21(3):399-410 e397.
- 900 28. Mertens J, et al. Evaluating cell reprogramming, differentiation and conversion technologies in  
901 neuroscience. *Nature reviews*. 2016;17(7):424-437.
- 902 29. Millichap JJ, et al. KCNQ2 encephalopathy: Features, mutational hot spots, and ezogabine  
903 treatment of 11 patients. *Neurol Genet*. 2016;2(5):e96.
- 904 30. Fisher RS, et al. Operational classification of seizure types by the International League Against  
905 Epilepsy: Position Paper of the ILAE Commission for Classification and Terminology. *Epilepsia*.  
906 2017;58(4):522-530.
- 907 31. Wilmshurst JM, et al. Summary of recommendations for the management of infantile seizures:  
908 Task Force Report for the ILAE Commission of Pediatrics. *Epilepsia*. 2015;56(8):1185-1197.
- 909 32. Zhang Y, et al. Rapid single-step induction of functional neurons from human pluripotent stem  
910 cells. *Neuron*. 2013;78(5):785-798.
- 911 33. Nehme R, et al. Combining NGN2 Programming with Developmental Patterning Generates Human  
912 Excitatory Neurons with NMDAR-Mediated Synaptic Transmission. *Cell Rep*. 2018;23(8):2509-  
913 2523.
- 914 34. Boulting GL, et al. A functionally characterized test set of human induced pluripotent stem cells.  
915 *Nat Biotechnol*. 2011;29(3):279-286.
- 916 35. Orhan G, et al. Dominant-negative effects of KCNQ2 mutations are associated with epileptic  
917 encephalopathy. *Annals of neurology*. 2014;75(3):382-394.
- 918 36. Hochbaum DR, et al. All-optical electrophysiology in mammalian neurons using engineered  
919 microbial rhodopsins. *Nature methods*. 2014;11(8):825-833.
- 920 37. Kiskinis E, et al. All-Optical Electrophysiology for High-Throughput Functional Characterization of  
921 a Human iPSC-Derived Motor Neuron Model of ALS. *Stem Cell Reports*. 2018;10(6):1991-2004.
- 922 38. Werley CA, et al. All-Optical Electrophysiology for Disease Modeling and Pharmacological  
923 Characterization of Neurons. *Curr Protoc Pharmacol*. 2017;78:11 20 11-11 20 24.

- 924 39. Lezmy J, et al. M-current inhibition rapidly induces a unique CK2-dependent plasticity of the axon  
925 initial segment. *Proceedings of the National Academy of Sciences of the United States of America*.  
926 2017;114(47):E10234-E10243.
- 927 40. Zhou N, et al. Suppression of KV7/KCNQ potassium channel enhances neuronal differentiation of  
928 PC12 cells. *Neuroscience*. 2016;333:356-367.
- 929 41. Berger SL, et al. Localized Myosin II Activity Regulates Assembly and Plasticity of the Axon Initial  
930 Segment. *Neuron*. 2018;97(3):555-570 e556.
- 931 42. Guan D, et al. Contributions of Kv7-mediated potassium current to sub- and suprathreshold  
932 responses of rat layer II/III neocortical pyramidal neurons. *Journal of neurophysiology*.  
933 2011;106(4):1722-1733.
- 934 43. Santini E, Porter JT. M-type potassium channels modulate the intrinsic excitability of infralimbic  
935 neurons and regulate fear expression and extinction. *J Neurosci*. 2010;30(37):12379-12386.
- 936 44. Latorre R, et al. Molecular Determinants of BK Channel Functional Diversity and Functioning.  
937 *Physiological reviews*. 2017;97(1):39-87.
- 938 45. Grubb MS, Burrone J. Activity-dependent relocation of the axon initial segment fine-tunes neuronal  
939 excitability. *Nature*. 2010;465(7301):1070-1074.
- 940 46. Wolfart J, Laker D. Homeostasis or channelopathy? Acquired cell type-specific ion channel  
941 changes in temporal lobe epilepsy and their antiepileptic potential. *Front Physiol*. 2015;6:168.
- 942 47. Turrigiano GG, Nelson SB. Homeostatic plasticity in the developing nervous system. *Nature*  
943 *reviews*. 2004;5(2):97-107.
- 944 48. Moulder KL, et al. Homeostatic effects of depolarization on Ca<sup>2+</sup> influx, synaptic signaling, and  
945 survival. *J Neurosci*. 2003;23(5):1825-1831.
- 946 49. Wefelmeyer W, et al. Homeostatic Plasticity of Subcellular Neuronal Structures: From Inputs to  
947 Outputs. *Trends in neurosciences*. 2016;39(10):656-667.
- 948 50. Wu WW, et al. Coupling of L-type Ca<sup>2+</sup> channels to KV7/KCNQ channels creates a novel, activity-  
949 dependent, homeostatic intrinsic plasticity. *Journal of neurophysiology*. 2008;100(4):1897-1908.
- 950 51. Swann JW, Rho JM. How is homeostatic plasticity important in epilepsy? *Advances in*  
951 *experimental medicine and biology*. 2014;813:123-131.
- 952 52. Miranda MF, et al. Research on ionic homeostatic equilibrium may change our view about  
953 epilepsy. *Clinics (Sao Paulo)*. 2013;68(8):1074-1076.
- 954 53. Bernard C, et al. Acquired dendritic channelopathy in temporal lobe epilepsy. *Science (New York,*  
955 *NY)*. 2004;305(5683):532-535.
- 956 54. Poolos NP, Johnston D. Dendritic ion channelopathy in acquired epilepsy. *Epilepsia*. 2012;53  
957 Suppl 9:32-40.
- 958 55. Matthews EA, et al. The fast and slow afterhyperpolarizations are differentially modulated in  
959 hippocampal neurons by aging and learning. *J Neurosci*. 2009;29(15):4750-4755.
- 960 56. Steriade M. Neocortical cell classes are flexible entities. *Nature reviews*. 2004;5(2):121-134.
- 961 57. Timofeev I, Steriade M. Neocortical seizures: initiation, development and cessation. *Neuroscience*.  
962 2004;123(2):299-336.

- 963 58. Zhang L, McBain CJ. Potassium conductances underlying repolarization and after-  
964 hyperpolarization in rat CA1 hippocampal interneurons. *The Journal of physiology*. 1995;488 ( Pt  
965 3):661-672.
- 966 59. Storm JF. An after-hyperpolarization of medium duration in rat hippocampal pyramidal cells. *The*  
967 *Journal of physiology*. 1989;409:171-190.
- 968 60. Kaufmann WA, et al. Two distinct pools of large-conductance calcium-activated potassium  
969 channels in the somatic plasma membrane of central principal neurons. *Neuroscience*.  
970 2010;169(3):974-986.
- 971 61. Li Q, Yan J. Chapter Two - Modulation of BK Channel Function by Auxiliary Beta and Gamma  
972 Subunits. In: Contet C, ed. *International Review of Neurobiology*. Vol 128. Academic Press;  
973 2016:51-90.
- 974 62. Niday Z, Tzingounis AV. Potassium Channel Gain of Function in Epilepsy: An Unresolved  
975 Paradox. *Neuroscientist*. 2018;24(4):368-380.
- 976 63. Sanabria ER, et al. Initiation of network bursts by Ca<sup>2+</sup>-dependent intrinsic bursting in the rat  
977 pilocarpine model of temporal lobe epilepsy. *The Journal of physiology*. 2001;532(Pt 1):205-216.
- 978 64. Wyler AR, Ward AA, Jr. Neuronal firing patterns from epileptogenic foci of monkey and human.  
979 *Advances in neurology*. 1986;44:967-989.
- 980 65. Gast H, et al. Burst firing of single neurons in the human medial temporal lobe changes before  
981 epileptic seizures. *Clin Neurophysiol*. 2016;127(10):3329-3334.
- 982 66. Schindler KA, et al. Fast oscillations trigger bursts of action potentials in neocortical neurons in  
983 vitro: a quasi-white-noise analysis study. *Brain research*. 2006;1110(1):201-210.
- 984 67. Di Giorgio FP, et al. Human embryonic stem cell-derived motor neurons are sensitive to the toxic  
985 effect of glial cells carrying an ALS-causing mutation. *Cell Stem Cell*. 2008;3(6):637-648.
- 986 68. Pan Z, et al. Alternative splicing of KCNQ2 potassium channel transcripts contributes to the  
987 functional diversity of M-currents. *The Journal of physiology*. 2001;531(Pt 2):347-358.
- 988 69. Vierbuchen T, et al. Direct conversion of fibroblasts to functional neurons by defined factors.  
989 *Nature*. 2010;463(7284):1035-1041.
- 990 70. Hockemeyer D, et al. A drug-inducible system for direct reprogramming of human somatic cells to  
991 pluripotency. *Cell Stem Cell*. 2008;3(3):346-353.
- 992 71. Zufferey R, et al. Self-inactivating lentivirus vector for safe and efficient in vivo gene delivery. *J*  
993 *Virology*. 1998;72(12):9873-9880.
- 994 72. Adam Y, et al. All-optical electrophysiology reveals brain-state dependent changes in hippocampal  
995 subthreshold dynamics and excitability. *bioRxiv*. 2018.
- 996 73. Werley CA, et al. Ultrawidefield microscope for high-speed fluorescence imaging and targeted  
997 optogenetic stimulation. *Biomed Opt Express*. 2017;8(12):5794-5813.

998

999

1000

1001

1002 **MAIN FIGURES:**

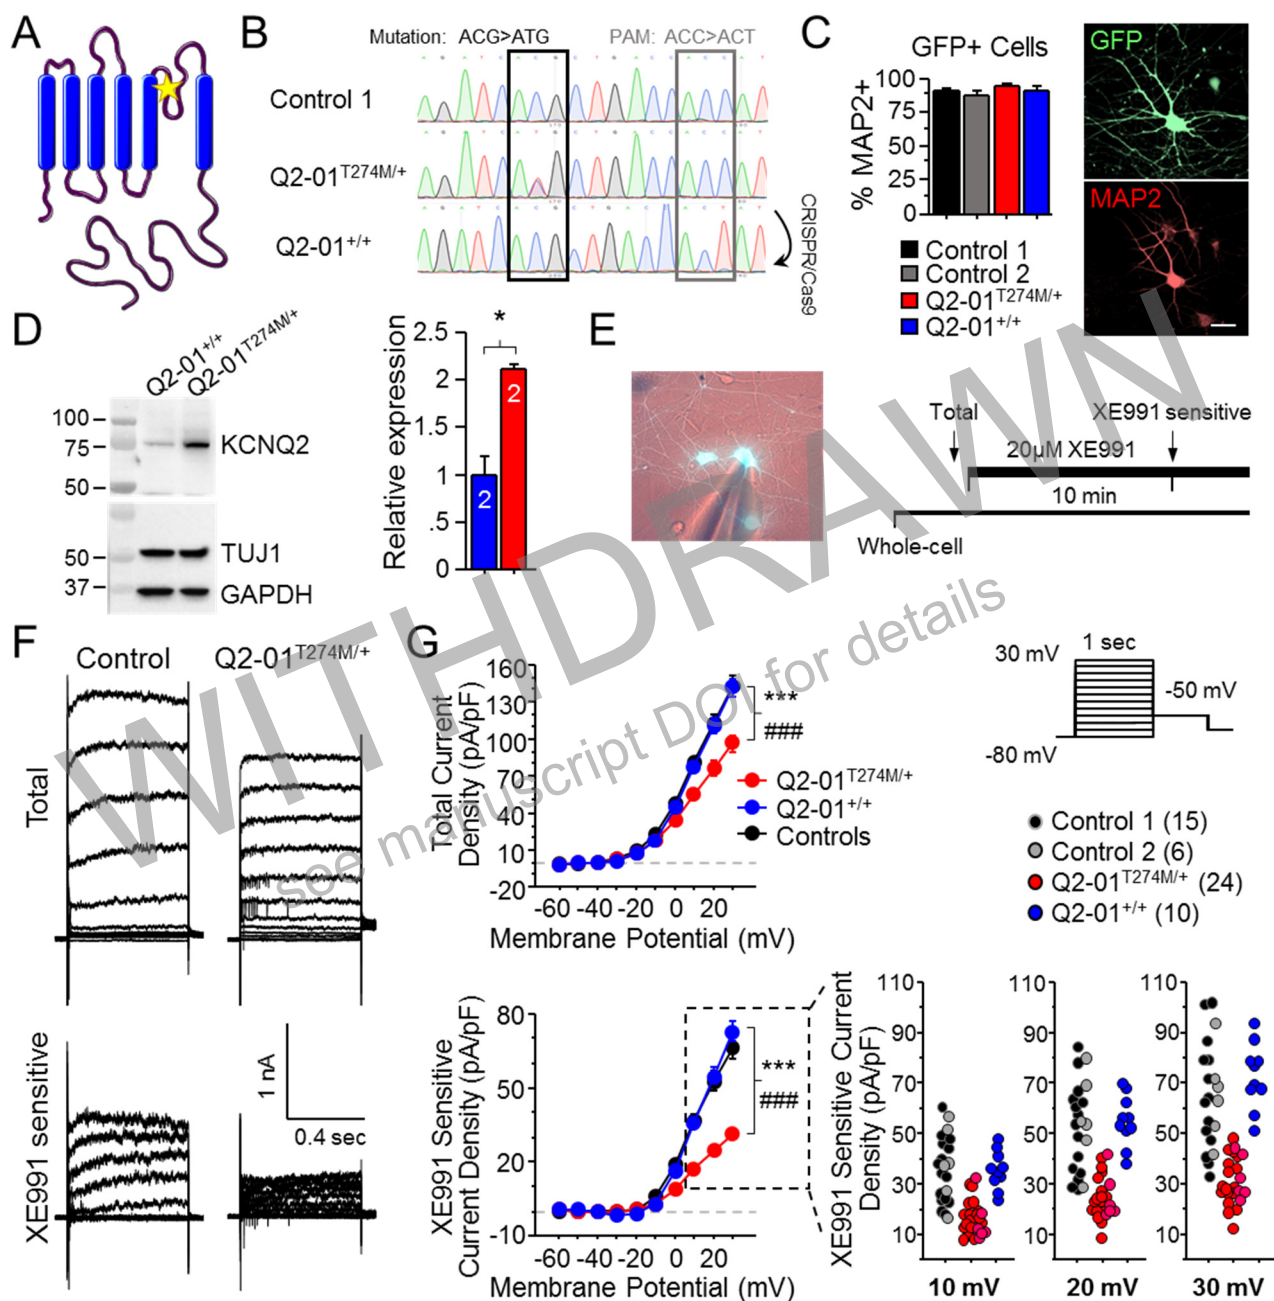

1003

1004 **Figure 1. KCNQ2-NEE patient-specific iPSC-derived neurons exhibit reduced M-currents.**

1005 (A) Proposed structure of KCNQ2 channel subunit containing the patient mutation T274M (yellow  
 1006 star) near the ion selectivity filter within the pore-loop domain. (B) DNA sequence  
 1007 electropherograms of *KCNQ2* in control and patient iPSCs before and after gene editing,  
 1008 demonstrate the correction of the heterozygous (T274M; c.821C>T) mutation. A silent mutation  
 1009 (T276T; ACC>ACT) was concurrently introduced in the PAM site (See [Supplementary Figure 1](#)  
 1010 and [Supplementary Tables 1-2](#)). (C) Quantification of GFP fluorescence coincident with MAP2  
 1011 immunopositive staining in two unrelated healthy controls and patient and isogenic control iPSC-  
 1012 derived neurons (See [Supplementary Figure 2](#)). Scale bar: 20 $\mu$ m. (D) Western blot analysis of  
 1013 KCNQ2 protein in patient-derived neurons relative to isogenic controls (t-test: \* $p=0.02$ ; N=2  
 1014 independent differentiations). TUJ1 quantification indicates that cell lysates contained similar  
 1015 levels of mature neurons. GAPDH was used as a loading control. (E) Left: Representative image  
 1016 of GFP-fluorescing neuron during patch-clamp recording. Right: Experimental protocol. Total

1017 steady-state current density and M-current density were measured in voltage-clamp mode after  
1018 establishing whole-cell configuration. **(F)** Representative traces recorded from control and  
1019 patient-derived neurons before XE991 application (top; total current) and after subtraction of  
1020 XE991-insensitive currents (bottom; XE991 sensitive/M-current). **(G)** Total and XE991-sensitive  
1021 current density plotted against test potential. Top, repeated measures ANOVA for total current  
1022 density during week 4 by cell line:  $F_{(2,468)}=8.93$ ,  $***p=0.0005$ ; cell line/voltage step interaction:  
1023  $F_{(18,468)}=11.11$ ,  $###p<0.0001$ ; Fisher's PLSD posthoc comparing healthy controls (black) to  
1024 isogenic control (blue) neurons ( $p=0.7282$ ) and Q2-01<sup>T274M/+</sup> (red) to either isogenic control  
1025 ( $p=0.0071$ ) or healthy control neurons ( $p=0.0002$ ). Bottom, M-current density repeated measures  
1026 ANOVA:  $F_{(2,468)}=29.83$ ,  $***p<0.0001$ ; cell line/voltage step interaction:  $F_{(18,468)}=33.36$ ,  
1027  $###p<0.0001$ ; Fisher's PLSD posthoc test comparing healthy controls to isogenic controls  
1028 ( $p=0.9446$ ) and Q2-01<sup>T274M/+</sup> neurons to either isogenic controls or healthy controls ( $p<0.0001$ ;  
1029  $N=21$  healthy controls combined). Bottom right: plot of M-current densities from all neurons  
1030 recorded during 10, 20 and 30mV steps. Number of neurons analyzed is displayed within the  
1031 figure. Values displayed as mean $\pm$ SEM.

1032  
1033  
1034  
1035  
1036  
1037  
1038  
1039  
1040  
1041  
1042  
1043  
1044  
1045  
1046  
1047  
1048  
1049  
1050  
1051  
1052  
1053  
1054  
1055  
1056  
1057  
1058  
1059  
1060  
1061

WITHDRAWN  
see manuscript DOI for details

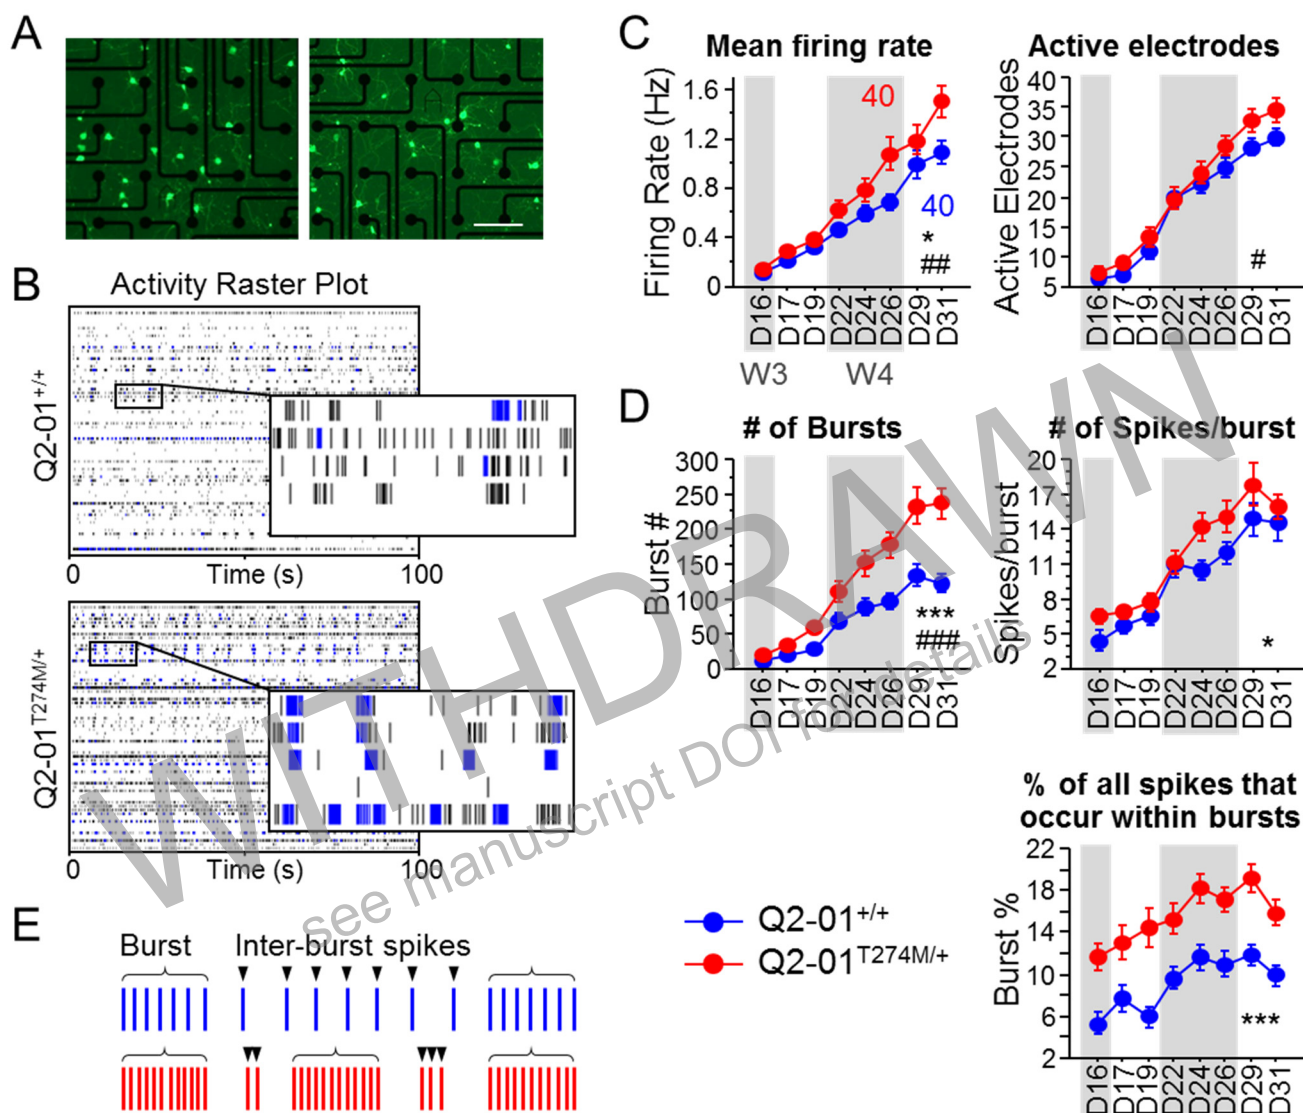

1062  
1063  
1064  
1065  
1066  
1067  
1068  
1069  
1070  
1071  
1072  
1073  
1074  
1075  
1076  
1077  
1078  
1079  
1080  
1081

**Figure 2. KCNQ2-NEE neurons exhibit enhanced spontaneous neuronal network activity.** (A) Representative images of GFP-fluorescing patient-derived (Right) and isogenic control neurons (Left) plated on MEA wells at 31 days in culture. Scale bar: 200 $\mu$ m (B) Representative raster plots from a single MEA well of patient-derived and isogenic control neurons on day 31. Each row represents the signal detected by a single electrode, black ticks indicate single spikes and blue ticks spikes that occur within bursts. (C) Longitudinal analysis of the mean firing frequency (repeated measures ANOVA for genotype:  $F_{(1,546)} = 5.63$ ,  $*p = 0.02$ ; genotype/day interaction:  $F_{(7,546)} = 3.17$ ,  $##p = 0.0027$ ); number of active electrodes (repeated measures ANOVA for genotype:  $p = 0.198$ ; genotype/day interaction:  $F_{(7,546)} = 2.49$ ,  $#p = 0.0159$ ). (D) Number of bursts detected (repeated measures ANOVA for genotype:  $F_{(1,546)} = 18.82$ ,  $***p < 0.001$ ; genotype/day interaction:  $F_{(7,546)} = 6.71$ ,  $###p < 0.0001$ ); number of spikes within bursts (repeated measures ANOVA for genotype:  $F_{(1,546)} = 4.17$ ,  $*p = 0.0445$ ); and percentage of spikes which were found to occur within bursts (repeated measures ANOVA for genotype:  $F_{(1,546)} = 31.62$ ,  $***p < 0.0001$ ; See [Supplementary Figure 3](#)). (E) Illustration of firing pattern showing increased phasic firing in bursts of patient neurons (red) as compared to isogenic controls (blue). Number of wells analyzed per cell line is displayed within the figure from 4 independent differentiations. Values displayed are mean  $\pm$  SEM.



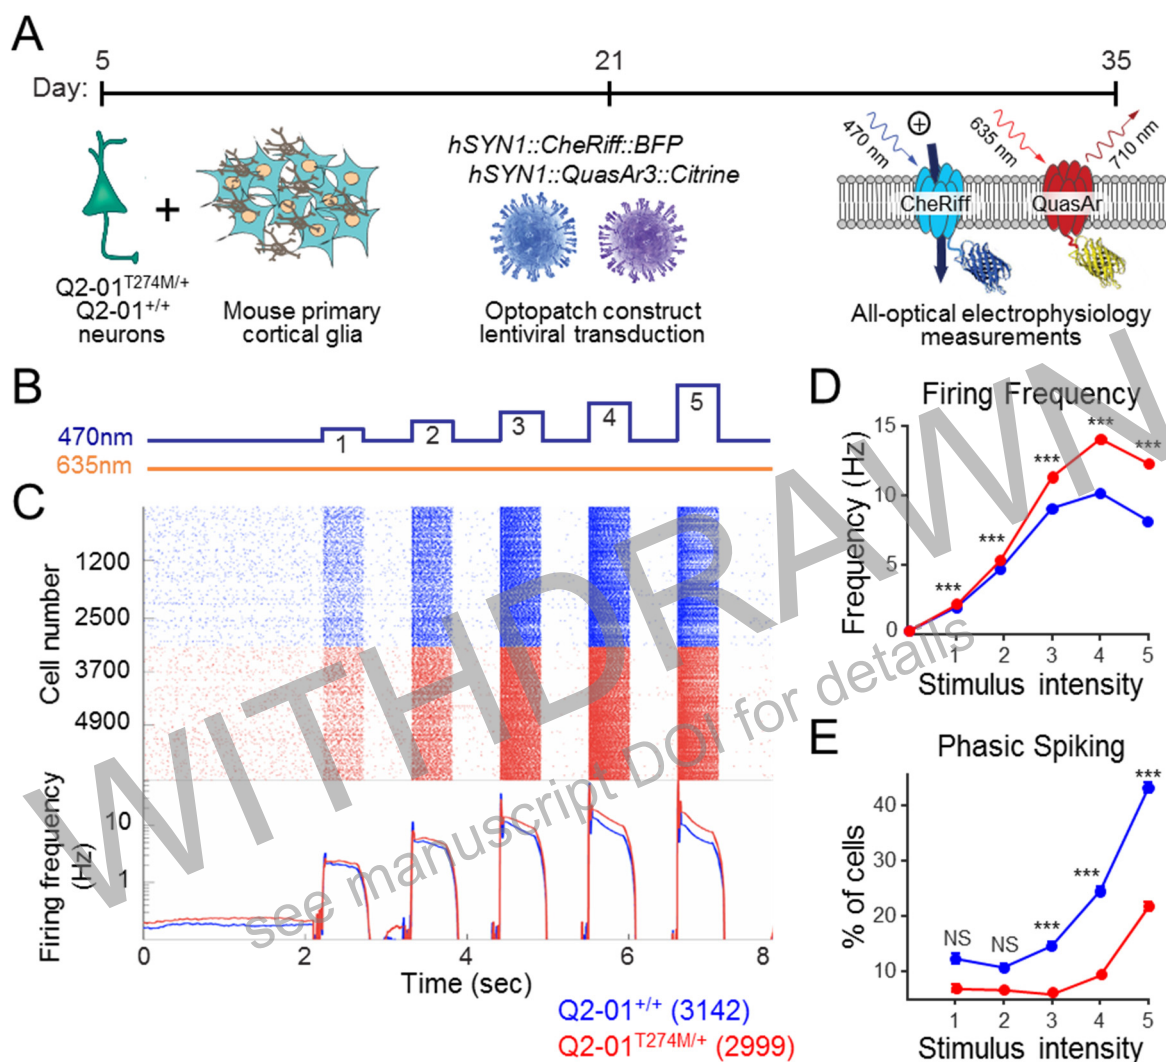

**Figure 3. KCNQ2-NEE neurons are hyperexcitable relative to their isogenic controls as measured by Optopatch recordings.**

(A) Experimental outline: neurons were co-cultured with primary glial cells and on day 21 were infected with lentiviruses encoding the Optopatch constructs. CheRiff was coupled to a BFP fluorescence reporter and QuasAr3 to Citrine. Optopatch imaging was performed on day 35. (B) Illumination protocol: following 2 sec of spontaneous activity recording, neurons were subjected to five, 500 ms stimulation pulses of increasing blue light intensity (1: 2.45, 2: 5.5, 3: 14.67, 4: 33, and 5: 88 mW/cm<sup>2</sup>) at 1Hz, to activate CheRiff at 470 nm. Changes in membrane potential were monitored through changes in QuasAr3 fluorescence excited by red light at 635 nm. (C) Top: raster plot showing spike timing for individual neurons across the stimulation protocol. Each row represents an individual neuron and each point an AP. Bottom: average firing frequency of mutant and control neurons across the stimulation protocol. (D-E) Average firing frequency and percentage of cells that exhibit phasic spiking for each stimulus intensity step. Number of neurons analyzed is displayed within the figure. Values displayed are mean ± SEM. Statistical significance determined by using the Kolmogorov-Smirnov statistic, \*\**p*<0.01 and \*\*\**p*<0.005, NS: not significant.

1082  
1083  
1084  
1085  
1086  
1087  
1088  
1089  
1090  
1091  
1092  
1093  
1094  
1095  
1096  
1097  
1098  
1099

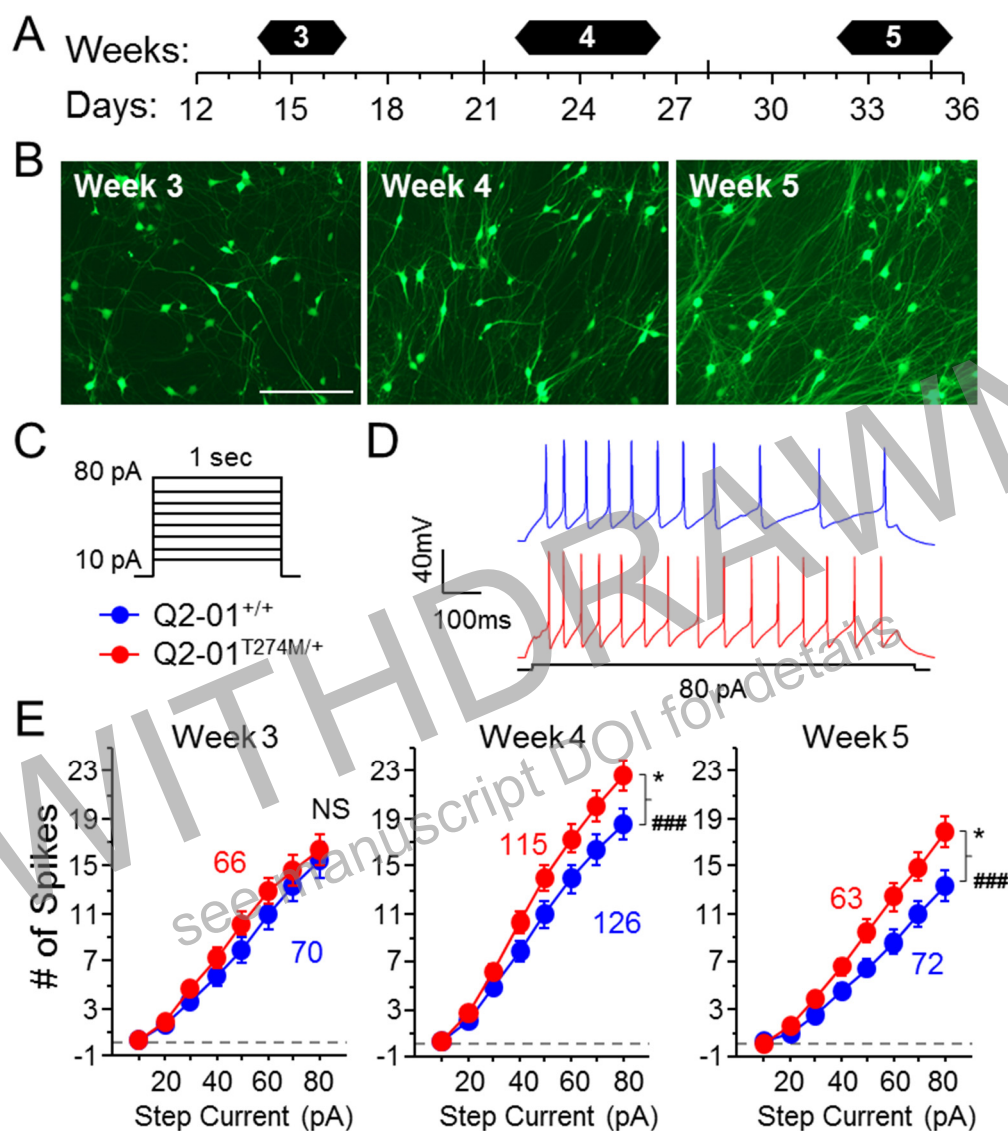

1100

1101

1102 **Figure 4. KCNQ2-NEE neurons exhibit progressive enhancement of intrinsic excitability.**

1103 (A) Experimental time line. (B) Representative images of GFP-fluorescing isogenic control

1104 neurons during week 3, 4 and 5. Scale bare: 500 $\mu$ m. (C) Current-clamp protocol. Intrinsic

1105 excitability was measured in current-clamp mode using 1 sec somatic current injection steps (10-

1106 80pA) from a holding potential of -65mV. (D) Representative traces of patient-derived (red) and

1107 isogenic control (blue) neurons firing APs during an 80 pA current stimulus. (E) Numbers of APs

1108 that patient-derived and isogenic control neurons fired during week 3 (repeated measures

1109 ANOVA for genotype:  $p = 0.21$ ; genotype/current injection amplitude interaction for week 3:  $p =$

1110  $0.38$ ), week 4 (repeated measures ANOVA for genotype:  $F_{(1,1673)} = 5.14$ ,  $*p = 0.015$ ;

1111 genotype/current injection amplitude interaction:  $F_{(7,1673)} = 4.79$ ,  $###p < 0.0001$ ) and week 5

1112 (repeated measures ANOVA for genotype:  $F_{(1,931)} = 5.68$ ,  $*p = 0.018$ ; genotype/current injection

1113 amplitude interaction:  $F_{(7,931)} = 5.27$ ,  $###p < 0.0001$ ). NS: not significant. Number of neurons

1114 analyzed is displayed within the figure and in Table 1 (See Supplementary Figure 5). Values

1115 displayed are mean  $\pm$  SEM.

1116

1117

1118

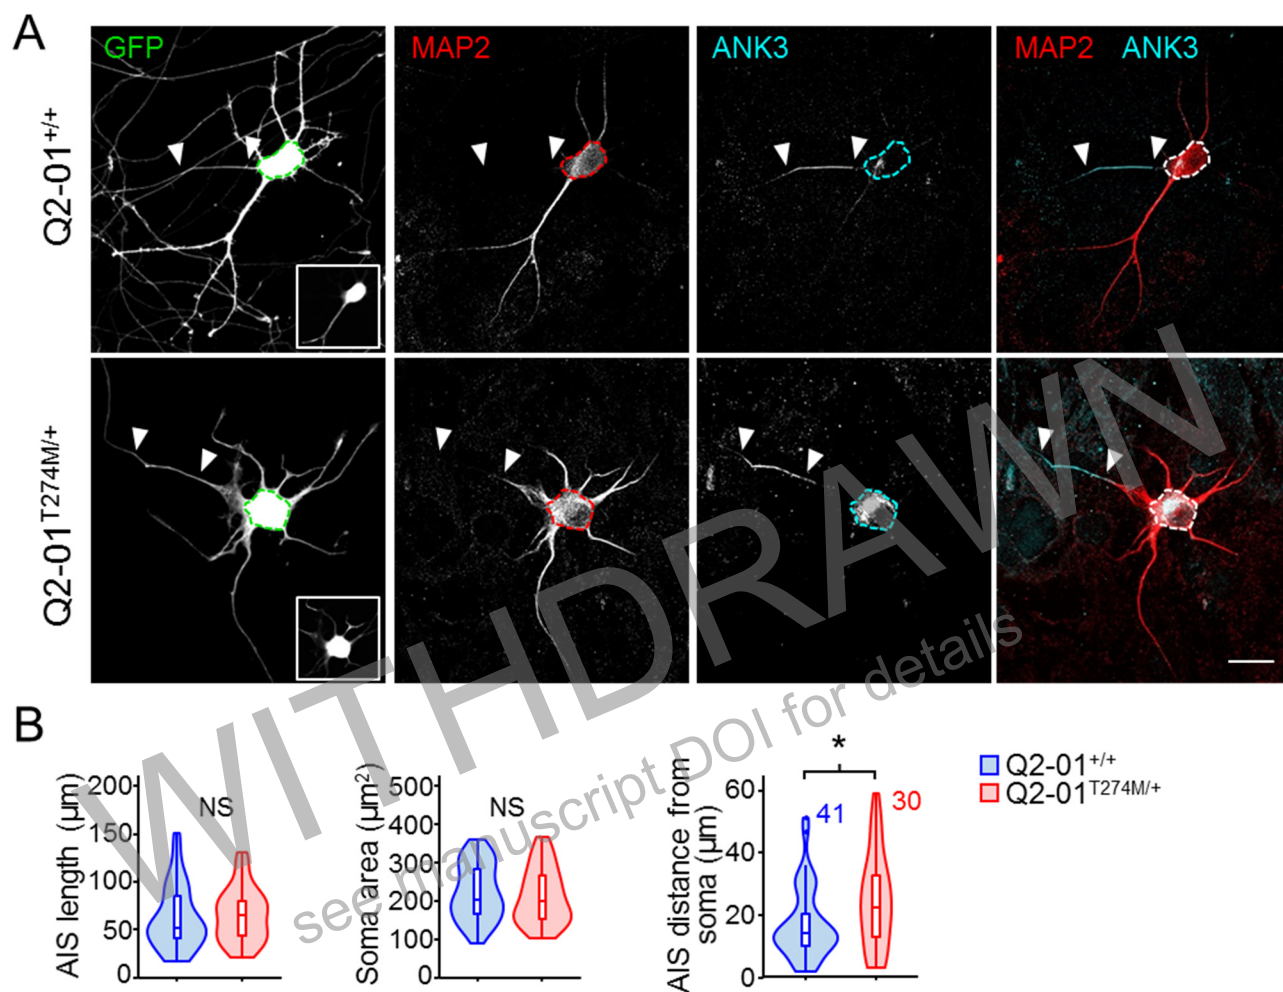

1119

1120

1121 **Figure 5. KCNQ2-NEE neurons exhibit a distal shift of the AIS.** (A) Representative confocal  
1122 images of 4-week old patient-derived and isogenic control neurons immunostained with GFP,  
1123 MAP2 and ANK3. Dotted lines outline the soma. Insert at the bottom of GFP panel shows the  
1124 specific image used to select the soma. White triangles indicate beginning and end of the axon  
1125 initial segment (AIS). The end of the MAP2 signal that coincided with the beginning of the ANK3  
1126 signal was used at the start of the AIS. Scale bar: 20 $\mu\text{m}$ . (B) Morphometric analysis of patient-  
1127 derived and isogenic control neurons. AIS longest path length, AIS total length and soma area  
1128 were not significantly different. Patient-derived neurons exhibited a greater distance between the  
1129 soma and the start of the AIS ( $24.9 \pm 2.7 \mu\text{m}$ ) as compared to isogenic controls ( $17.5 \pm 1.7 \mu\text{m}$ ; t-  
1130 test: \* $p = 0.0188$ ). Number of neurons analyzed is displayed within the figure. NS: not significant.  
1131 Values displayed are mean  $\pm$  SEM.

1132

1133

1134

1135

1136

1137

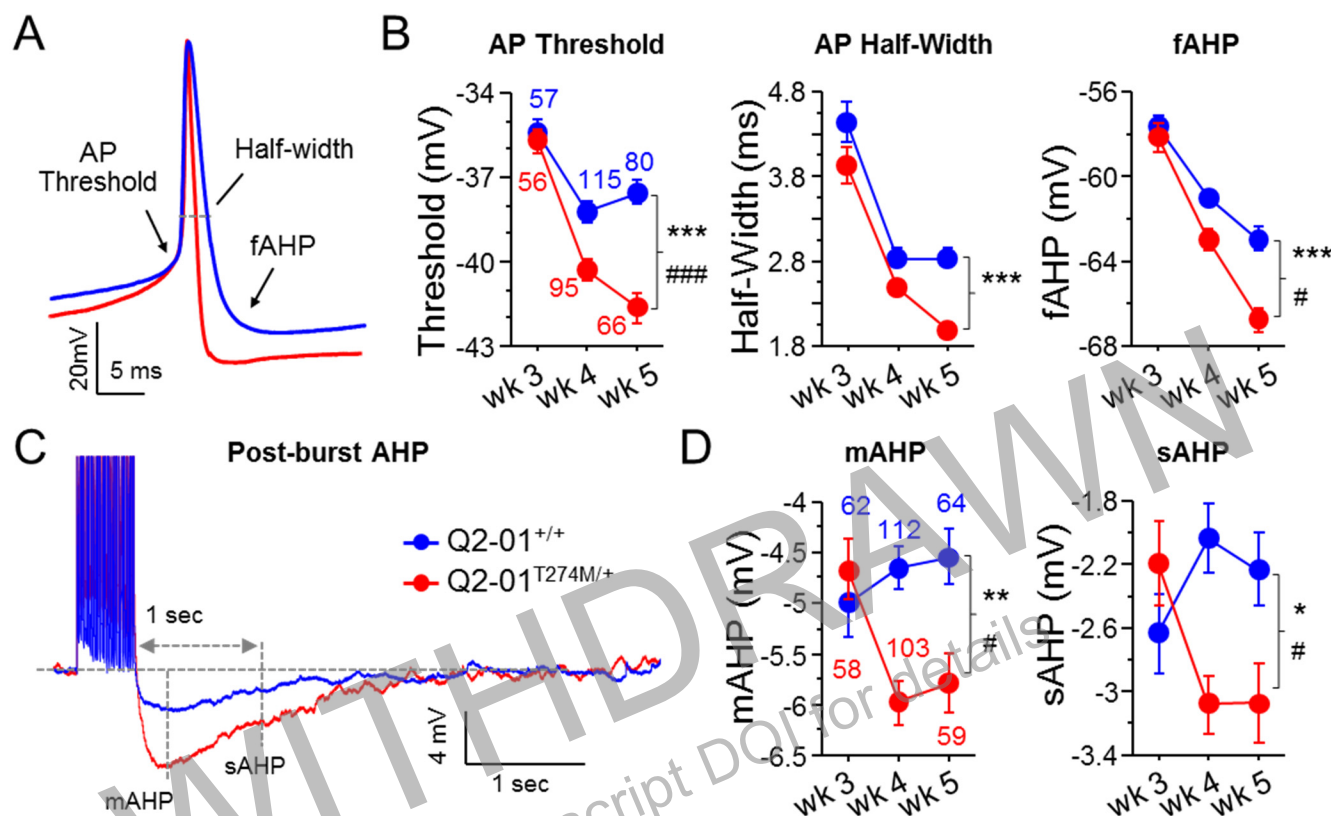

1138

1139

1140 **Figure 6. KCNQ2-NEE neurons exhibit progressive enhancement of AP repolarization and**

1141 **post-burst AHP. (A)** Representative traces showing AP amplitude, threshold, half-width and

1142 **fAHP. (B)** Analysis of AP properties measured during week 3, 4 and 5. Patient-derived (red)

1143 **F**<sub>(1,463)</sub> = 42.17; \*\*\**p* < 0.0001; genotype/weeks interaction: **F**<sub>(2, 463)</sub> = 9.16; ###*p* = 0.0001) and

1144 **and enhanced repolarization with shorter AP half-widths (two-way ANOVA for genotype: **F****

1145 **27.88; \*\*\**p* < 0.0001) and larger fAHPs (two-way ANOVA for genotype: **F****

1146 **27.18; \*\*\**p* < 0.0001; genotype/weeks interaction: **F****

1147 **4.17; #*p* = 0.02). Post hoc analysis using t-tests to compare patient-derived and isogenic control**

1148 **neurons at each time point revealed differences in these properties only on week 4 and 5, with no**

1149 **significant differences on week 3. (C)** Representative whole-cell current-clamp traces showing

1150 **post-burst AHPs after 50 Hz train of 25 APs evoked by 2 ms/1.2 nA suprathreshold current**

1151 **stimuli. (D)** Patient-derived neurons had enhanced mAHP (two-way ANOVA for genotype: **F**

1152 **9.83; \*\**p* = 0.0018; genotype/weeks interaction: **F****

1153 **4.93; #*p* = 0.0076) and sAHP (two-way ANOVA for genotype: **F****

1154 **4.86;**

1155 **\**p* = 0.0281; genotype/weeks interaction: **F****

1156 **5.14; #*p* = 0.0062). Post hoc analysis using t-**

1157 **tests to compare patient and isogenic control neurons at each time point revealed differences in**

1158 **mAHP and sAHP only on week 4 and 5, with no significant differences on week 3. Number of**

1159 **neurons analyzed is displayed within the figure and in [Table 1](#) (Also see [Supplementary Figure](#)**

1160 **5). Values displayed are mean ± SEM.**

1161

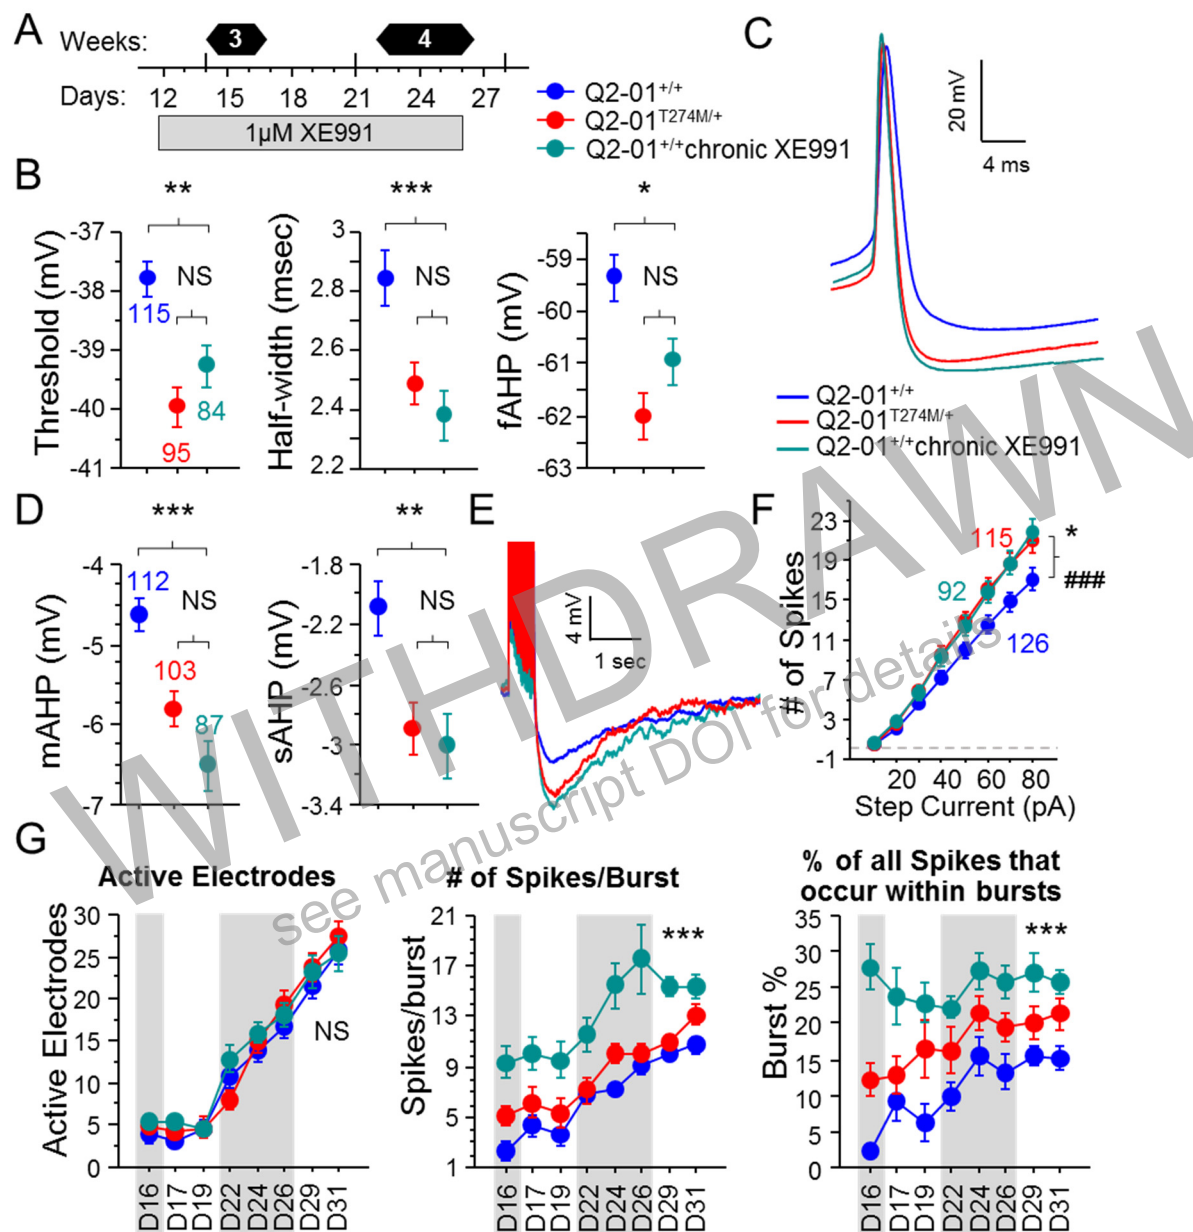

1162

1163 **Figure 7. Chronic Inhibition of M-current in Control Neurons Phenocopies KCNQ2-NEE AP**  
 1164 **Properties.** (A) Experimental time line. (B) AP threshold, half-width and fAHP of isogenic control  
 1165 neurons chronically treated with 1  $\mu$ M XE991 (Q2-01<sup>+/+</sup> chronic XE991) were significantly different  
 1166 from untreated isogenic control neurons (ANOVA, Fisher's PLSD posthoc test for AP threshold:  
 1167 \*\* $p=0.003$ ; AP half-width: \*\*\* $p=0.0002$ ; fAHP: \* $p=0.0107$ ), but were not significantly different from  
 1168 patient-derived neurons (ANOVA, Fisher's PLSD posthoc test for AP threshold:  $p=0.137$ ; AP half-  
 1169 width:  $p=0.421$ ; fAHP:  $p=0.112$ ). (C) Representative AP traces from Q2-01<sup>T274M/+</sup>, Q2-01<sup>+/+</sup> and  
 1170 Q2-01<sup>+/+</sup> chronic XE991 neurons. (D) The post-burst AHP is enhanced after chronic XE991  
 1171 treatment in isogenic control neurons (One-way ANOVA and Fisher's PLSD posthoc test for  
 1172 mAHP: \*\*\* $p < 0.0001$ ; sAHP: \*\* $p=0.0008$ ), to levels similar to patient-derived neurons (mAHP:  
 1173  $p=0.0532$ ; sAHP:  $p=0.69$ ). (E) Representative traces showing post-burst AHPs of Q2-01<sup>T274M/+</sup>,  
 1174 Q2-01<sup>+/+</sup> and Q2-01<sup>+/+</sup> chronic XE991 neurons. (F) Q2-01<sup>+/+</sup> chronic XE991 were able to fire  
 1175 significantly more APs per current stimulus than untreated control neurons (repeated measures  
 1176 ANOVA:  $F_{(2,2310)}=3.88$ , \* $p=0.0216$ ; interaction:  $F_{(14,2310)}=3.97$ , ### $p<0.0001$ ), and were not  
 1177 significantly different from patient-derived neurons (repeated measures ANOVA:  $p=0.9822$ ).  
 1178 Number of neurons analyzed is displayed within the figure and in Table 1 and 2 (also see

1179 [Supplementary Figure 6](#)). (G) MEA recordings from day 16 to 31 in culture recorded from Q2-  
1180 01<sup>T274M/+</sup>, Q2-01<sup>+/+</sup> and Q2-01<sup>+/+</sup> chronic XE991 neurons. There was no difference in the number  
1181 of active electrodes between the three groups of neurons (repeated measures ANOVA:  
1182  $p=0.5603$ ). Within the detected bursts Q2-01<sup>+/+</sup> chronic XE991 neurons exhibited a significantly  
1183 greater number of spikes as compared to both Q2-01<sup>T274M/+</sup> and Q2-01<sup>+/+</sup> neurons (repeated  
1184 measures ANOVA:  $F_{(2,315)}=27.63$ ,  $***p<0.0001$ ). The percentage of spikes that occurred within  
1185 bursts was significantly greater in Q2-01<sup>+/+</sup> chronic XE991 neurons as compared to both Q2-  
1186 01<sup>T274M/+</sup> and Q2-01<sup>+/+</sup> neurons (repeated measures ANOVA:  $F_{(2,315)}=28.02$ ,  $***p<0.0001$ ). 16  
1187 wells were analyzed per group from 2 independent differentiations (See [Supplementary Figure](#)  
1188 [7](#)). NS: not significant. Values displayed are mean  $\pm$  SEM.

1189  
1190  
1191

WITHDRAWN  
see manuscript DOI for details

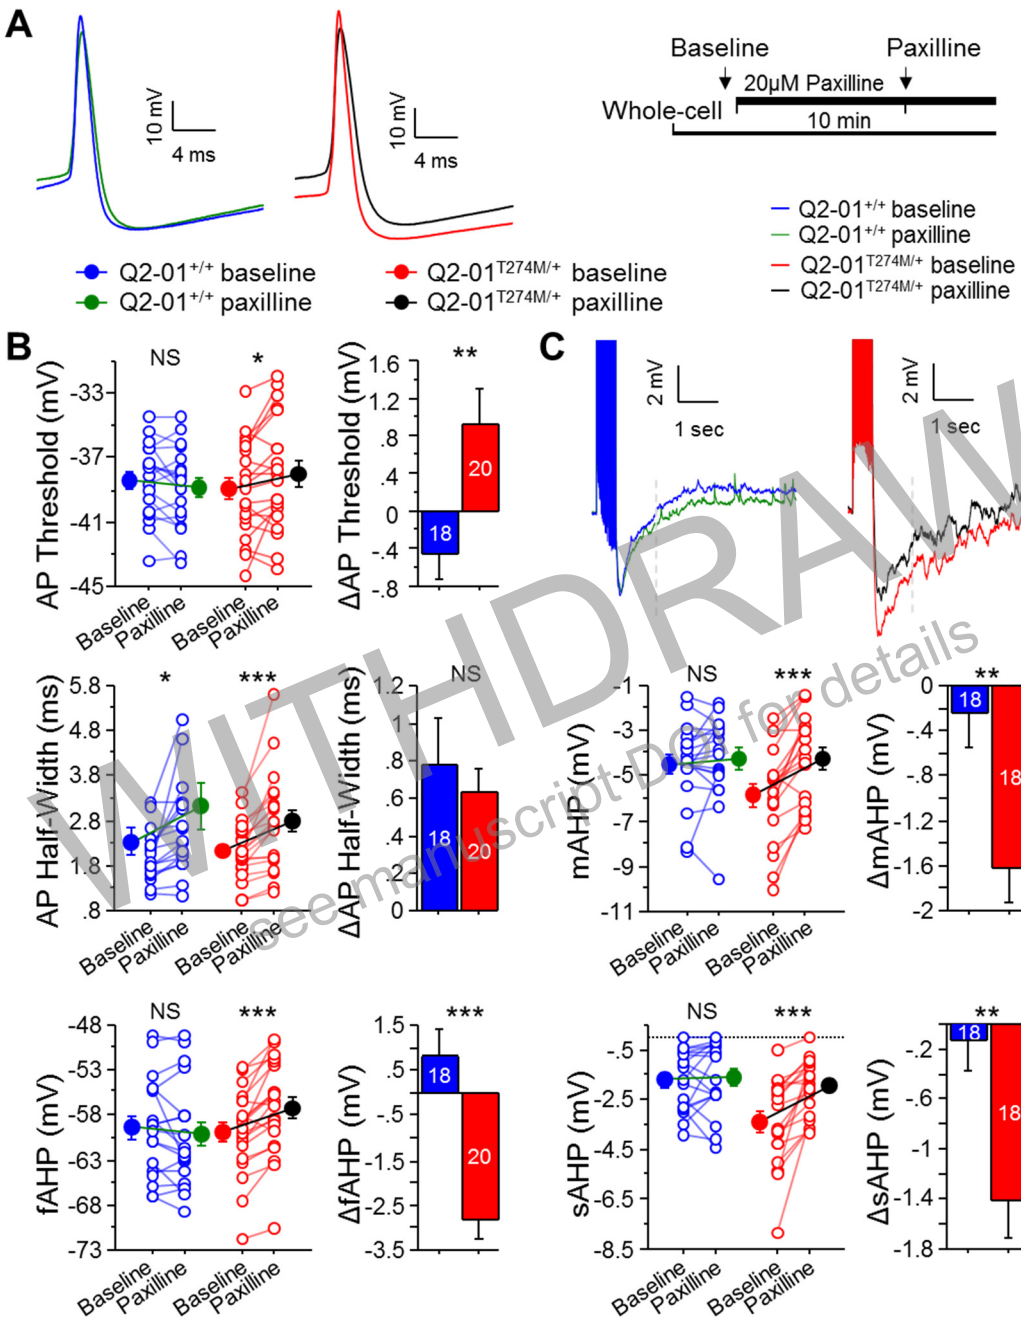

1192 **Figure 8. KCNQ2-NEE Neurons Exhibit a Dyshomeostatic Increase in BK Channel**  
 1193 **Function.** (A) Right: Experimental protocol. Baseline measures were made after establishing the  
 1194 whole-cell configuration in current-clamp mode. After exactly 10 min of continuous perfusion of  
 1195 20  $\mu$ M paxilline in aCSF, the AP properties and post-burst AHP were remeasured. Left:  
 1196 Representative trace of action potential before and after application of 20  $\mu$ M paxilline. (B) Acute  
 1197 application of paxilline significantly decreased AP threshold in patient neurons (\* $p = 0.0193$ ) but  
 1198 not in controls ( $p = 0.111$ ). Paxilline reduced AP repolarization by increasing AP half-width equally  
 1199 for patient and control neurons ( $\Delta$ AP half-width:  $p = 0.589$ ) but fAHP was only reduced in patient  
 1200 neurons (\*\*\* $p < 0.0001$ ) and not affected in controls ( $p = 0.1882$ ). (C) Top: Representative traces  
 1201 of post-burst AHPs. Acute application of paxilline significantly reduced mAHP (\*\* $p < 0.0001$ ) and  
 1202 sAHP (\*\* $p = 0.0002$ ) in patient neurons but not in controls (mAHP:  $p = 0.393$ ; sAHP  $p = 0.556$ ).  
 1203 Repeated measures ANOVA was used to compare paxilline effects. Number of neurons analyzed  
 1204 is displayed within the bar graphs, values displayed are mean  $\pm$  SEM.

1205 **TABLES:**

1206

1207 **Table 1: Developmental Timeline of Intrinsic Membrane Properties of Patient-Derived and**  
 1208 **Isogenic Control Neurons**

| Weeks:                                         | Week 3               |                          | Week 4               |                          | Week 5               |                          |
|------------------------------------------------|----------------------|--------------------------|----------------------|--------------------------|----------------------|--------------------------|
| Genotype:                                      | Q2-01 <sup>+/+</sup> | Q2-01 <sup>T274M/+</sup> | Q2-01 <sup>+/+</sup> | Q2-01 <sup>T274M/+</sup> | Q2-01 <sup>+/+</sup> | Q2-01 <sup>T274M/+</sup> |
| Resting Potential (mV)                         | -54.6 ± 0.6<br>(84)  | -54.2 ± 0.6<br>(91)      | -56.5 ± 0.5<br>(145) | -57.1 ± 0.5<br>(136)     | -60.2 ± 0.6<br>(86)  | -60.3 ± 0.6<br>(78)      |
| Input Resistance R <sub>N</sub><br>at RMP (MΩ) | 860.6 ± 35.4         | 998.3 ± 33.8 *           | 875.5 ± 25.2         | 932.9 ± 28.7             | 746.2 ± 28           | 732.6 ± 34.7             |
| Series Resistance R <sub>s</sub><br>RMP (MΩ)   | 14.6 ± 0.3           | 13.9 ± 0.3               | 14.2 ± 0.3           | 13.6 ± 0.3               | 13.2 ± 0.4           | 13.9 ± 0.4               |
| AP Amplitude from<br>baseline (mV)             | 87.6 ± 0.7<br>(57)   | 87.2 ± 0.8<br>(56)       | 91.9 ± 0.6<br>(115)  | 90.8 ± 0.6<br>(95)       | 93.2 ± 0.7<br>(80)   | 94.9 ± 0.8<br>(66)       |
| AP Threshold (mV)                              | -35.4 ± 0.5          | -35.7 ± 0.4              | -37.8 ± 0.3          | -40 ± 0.3 ***            | -37.5 ± 0.4          | -41.6 ± 0.5<br>***       |
| AP Half-Width (ms)                             | 4.4 ± 0.2            | 3.9 ± 0.2                | 2.9 ± 0.1            | 2.5 ± 0.1 **             | 2.8 ± 0.1            | 2 ± 0.1 ***              |
| fAHP (mV)                                      | -57.7 ± 0.6          | -58.1 ± 0.7              | -59.4 ± 0.4          | -62 ± 0.4 ***            | -63 ± 0.6            | -66.8 ± 0.6<br>***       |
| mAHP (mV)                                      | -5 ± 0.3<br>(62)     | -4.7 ± 0.3<br>(58)       | -4.7 ± 0.2<br>(112)  | -5.9 ± 0.2 ***<br>(103)  | -4.5 ± 0.3<br>(64)   | -5.7 ± 0.3 **<br>(59)    |
| sAHP (mV)                                      | -2.7 ± 0.3           | -2.2 ± 0.3               | -2.2 ± 0.2           | -3 ± 0.2 ***             | -2.3 ± 0.2           | -3.1 ± 0.3 *             |

1209

1210 \**p* < 0.05, \*\**p* < 0.005, \*\*\**p* < 0.0005: Fisher PLSD test comparing patient-derived neurons to  
 1211 isogenic controls during each week. Values displayed are Mean ± SEM. Number of neurons is  
 1212 indicated in ( ).

1213 TABLE ABBREVIATIONS: RMP - resting membrane potential; AP - Action potential; AHP -  
 1214 afterhyperpolarization; fAHP - fast AHP; mAHP - medium AHP; sAHP - slow AHP

1215

1216

1217

1218

1219

1220

1221

1222



1223 **Table 2: Week 4 intrinsic membrane properties of isogenic control neurons chronically**  
1224 **treated with XE991**

|                                                | Q2-01 <sup>+/+</sup> Chronic XE991<br>week 4 |
|------------------------------------------------|----------------------------------------------|
| Resting Potential (mV)                         | -60 ± 0.7 (106) ***                          |
| Input Resistance R <sub>N</sub> at<br>RMP (MΩ) | 984.1 ± 36 *                                 |
| Series Resistance R <sub>S</sub><br>RMP (MΩ)   | 14 ± 0.3                                     |
| AP Amplitude from<br>baseline (mV)             | 92.6 ± 0.7 (84)                              |
| AP Threshold (mV)                              | -39.2 ± 0.4 **                               |
| AP Half-Width (ms)                             | 2.5 ± 0.1 ***                                |
| fAHP (mV)                                      | -61 ± 0.5 *                                  |
| mAHP (mV)                                      | -6.5 ± 0.3 (87) ***                          |
| sAHP (mV)                                      | -3 ± 0.2 **                                  |

1225

1226 \**p* < 0.05, \*\**p* < 0.005, \*\*\**p* < 0.0005: Fisher PLSD test comparing Q2-01<sup>+/+</sup> neurons during week  
1227 4 that were untreated (See [Table 1](#)) and chronically treated with XE991. Number of neurons is  
1228 indicated in ().

1229 TABLE ABBREVIATIONS: RMP - resting membrane potential; AP - Action potential; AHP -  
1230 afterhyperpolarization; fAHP - fast AHP; mAHP - medium AHP; sAHP - slow AHP

1231

1232

1233

1234

1235

1236

1237

1238

1239

1240

1241 **SUPPLEMENTARY FIGURES:**

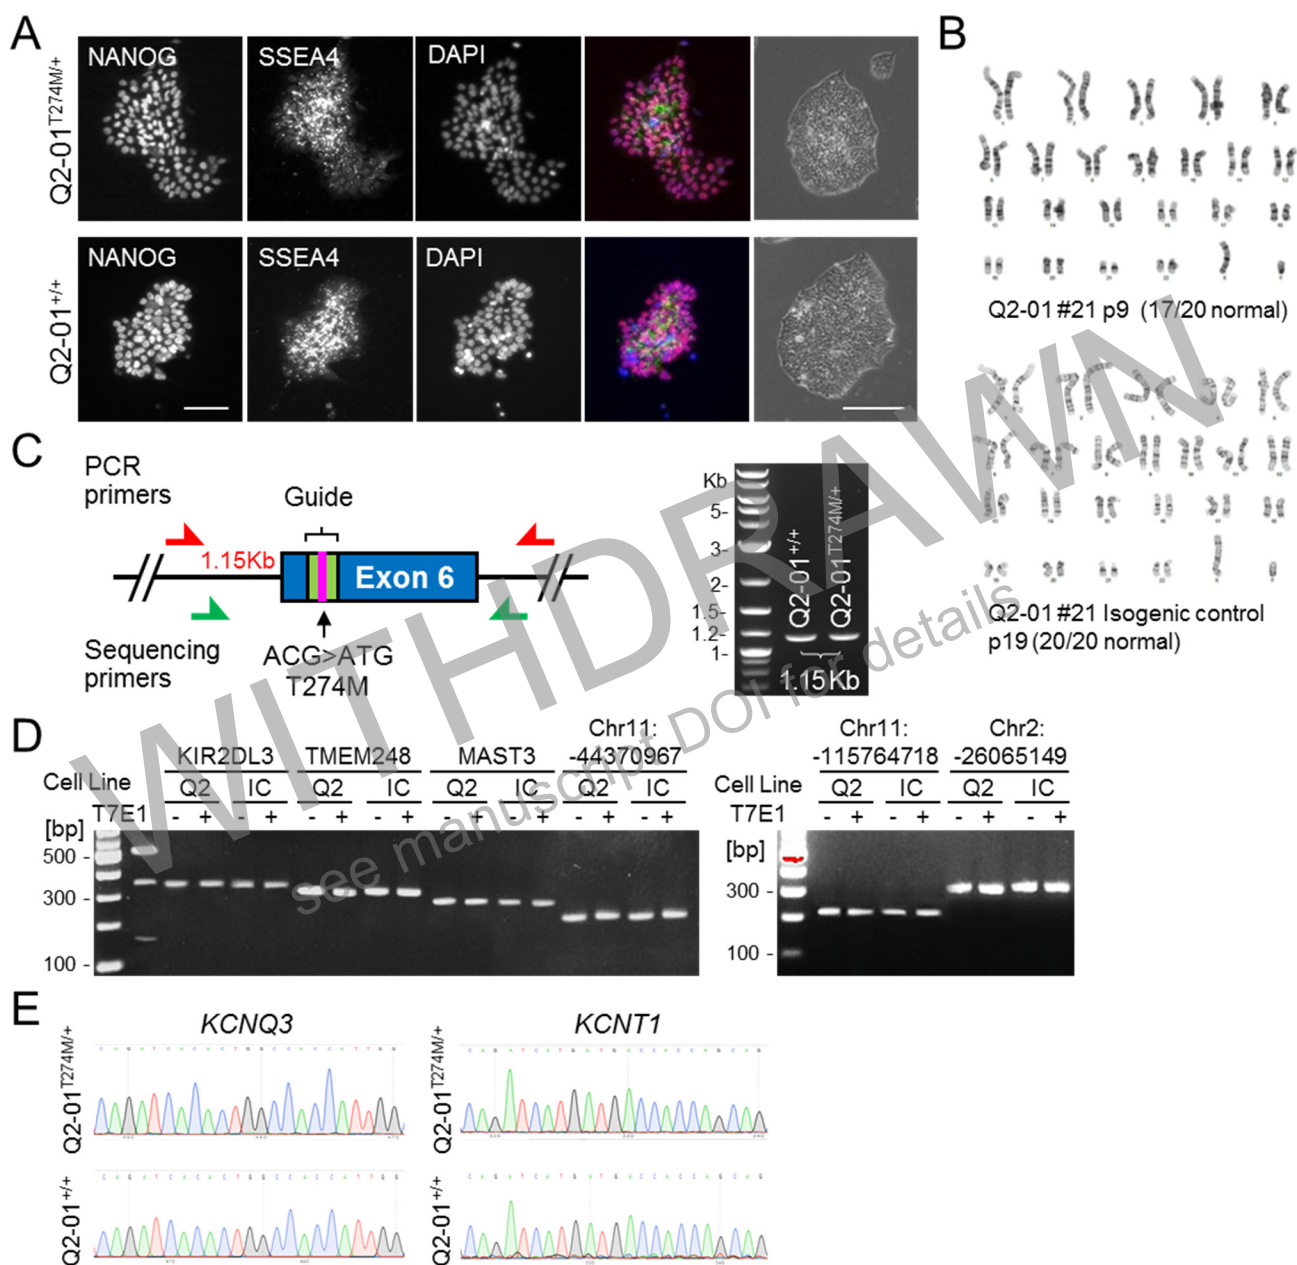

1242 **Supplementary Figure 1. Quality control studies of iPSC lines, related to Figure 1.** (A) Left:  
 1243 Immunocytochemical labeling of KCNQ2-NEE patient-derived (Q2-01<sup>T274M/+</sup>) and isogenic control  
 1244 (Q2-01<sup>+/+</sup>) iPSC lines with the pluripotency markers NANOG, SSEA4 and DAPI. Scale bar: 75µm.  
 1245 Right: Phase contrast images of iPSC colonies. Scale bar: 200 µm. (B) Karyotype analysis of  
 1246 patient and isogenic control iPSC lines. (C) Analysis of KCNQ2 targeted region after  
 1247 CRISPR/Cas9 gene correction. To validate the absence of large indels or mosaicism, a 1.15Kb  
 1248 DNA fragment of genomic DNA around the targeted site was amplified and subjected to Sanger  
 1249 sequencing (Figure 1B). Products from both the parental and corrected iPSC lines exhibited one  
 1250 band of the expected size. (D-E) Analysis of potential CRISPR off-target sites. The top eight  
 1251 genomic regions of homology with the CRISPR/Cas9 targeted region (Supplementary Table 1)  
 1252 were analyzed by a T7 endonuclease assay or Sanger Sequencing. No mutations were identified.  
 1253 (E) Two potential off-target sites were found in K<sup>+</sup> channels (KCNQ3 and KCNT1). PCR primers  
 1254 were designed to amplify ~850bp fragments around off-target sequence (Supplementary Table  
 1255 1). DNA sequencing electropherograms showed no mutations in these sites.

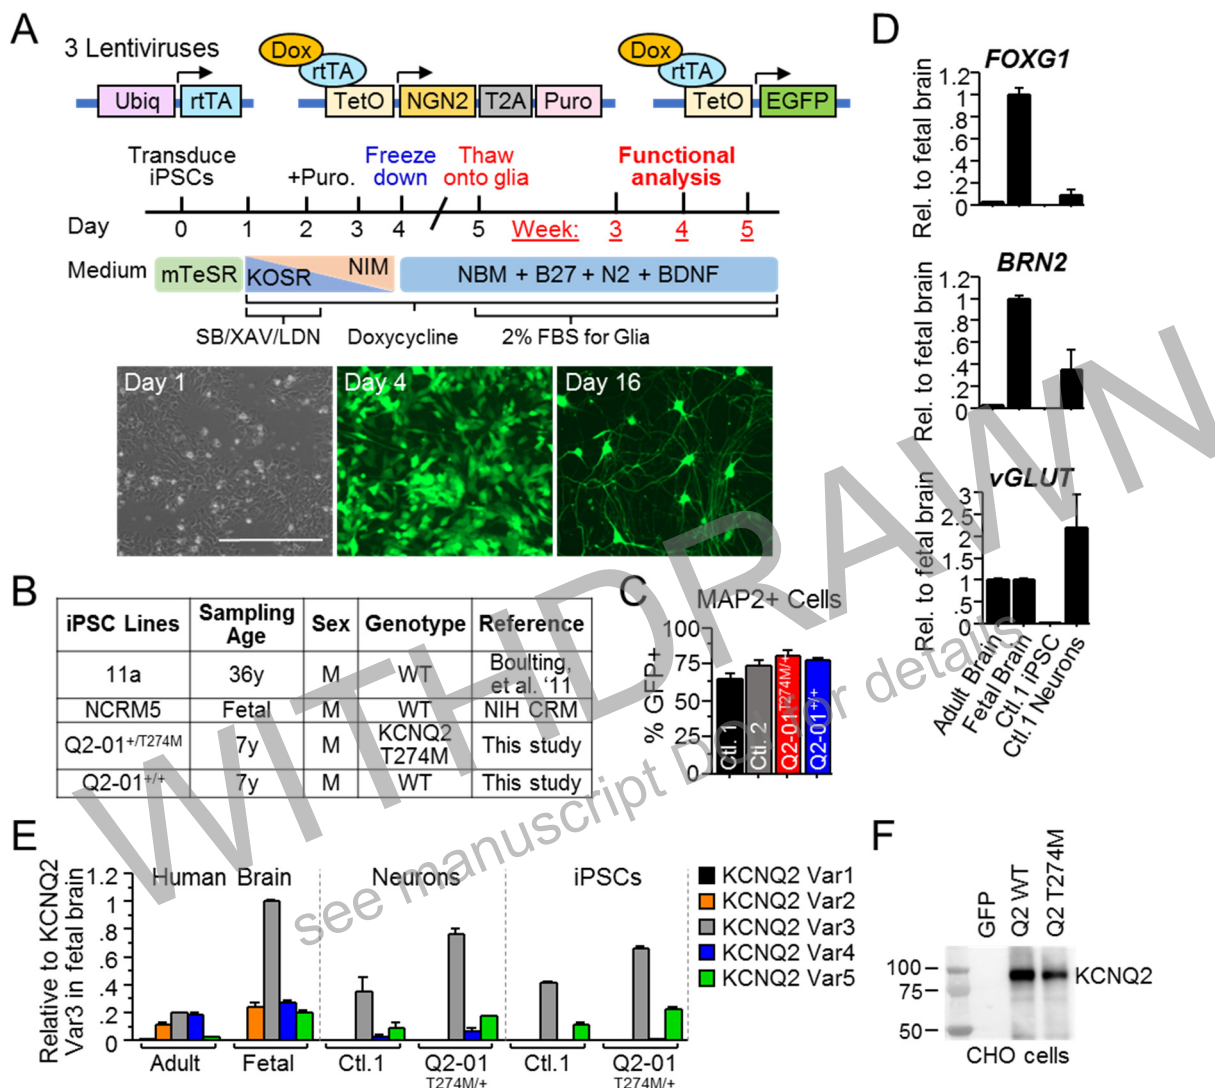

1256 **Supplementary Figure 2. Quality control studies of iPSC-derived neurons, related to**  
 1257 **Figure 1. (A)** Top: Design of lentiviral vectors for *Ngn2*-mediated conversion of iPSCs to cortical  
 1258 excitatory neurons through tetracycline-inducible expression of exogenous proteins driven by a  
 1259 tetracycline-inducible promoter (TetO). Cells are transduced with (i) a virus expressing reverse  
 1260 tetracycline-controlled transactivator (M2rtTA) driven by the Ubiquitin promoter, (ii) a virus  
 1261 expressing *Ngn2* linked by T2A to a puromycin (puro) resistance gene driven by TetO, and (iii)  
 1262 EGFP driven by the TetO promoter. Middle: Protocol for generation of cortical excitatory neurons  
 1263 (See [methods](#)). Bottom: Representative images illustrating the time course of the conversion of  
 1264 iPSCs into neurons. Corresponding bright field and GFP fluorescence images on day 1 before  
 1265 addition of doxycycline, day 4 before cryopreservation, and day 16 after thawing onto a mouse  
 1266 glia monolayer (day 5). This protocol is modified from Zhang et al., 2013. Scale bar: 400 $\mu$ m. **(B)**  
 1267 Table of iPSC lines used in this study. **(C)** Quantification of MAP2 immunopositive staining with  
 1268 MAP2 antibody coincident with GFP fluorescence in iPSC-derived neurons. More than 65% of  
 1269 the MAP2 positive neurons were also positive for GFP in all iPSC lines as quantified by  
 1270 fluorescent microscopy ([Figure 1C](#)). **(D)** RNA expression analysis using quantitative RT-PCR of  
 1271 *vGLUT2*, *FOXG1* and *BRN2* that are characteristic of excitatory layer 2/3 cortical neurons in  
 1272 healthy control iPSC-derived neurons. Human adult and fetal brain were used as controls. **(E)**  
 1273 RT-qPCR expression analysis of *KCNQ2* splice variants in the differentiated neuronal cultures  
 1274 using isoform-specific primers ([Supplementary Table 2](#)). Human adult and fetal brain were used  
 1275 as controls. **(F)** Western blot analysis of proteins isolated from CHO cells transfected with  
 1276 plasmids encoding either wild type or T274M mutant *KCNQ2* human variant 4.

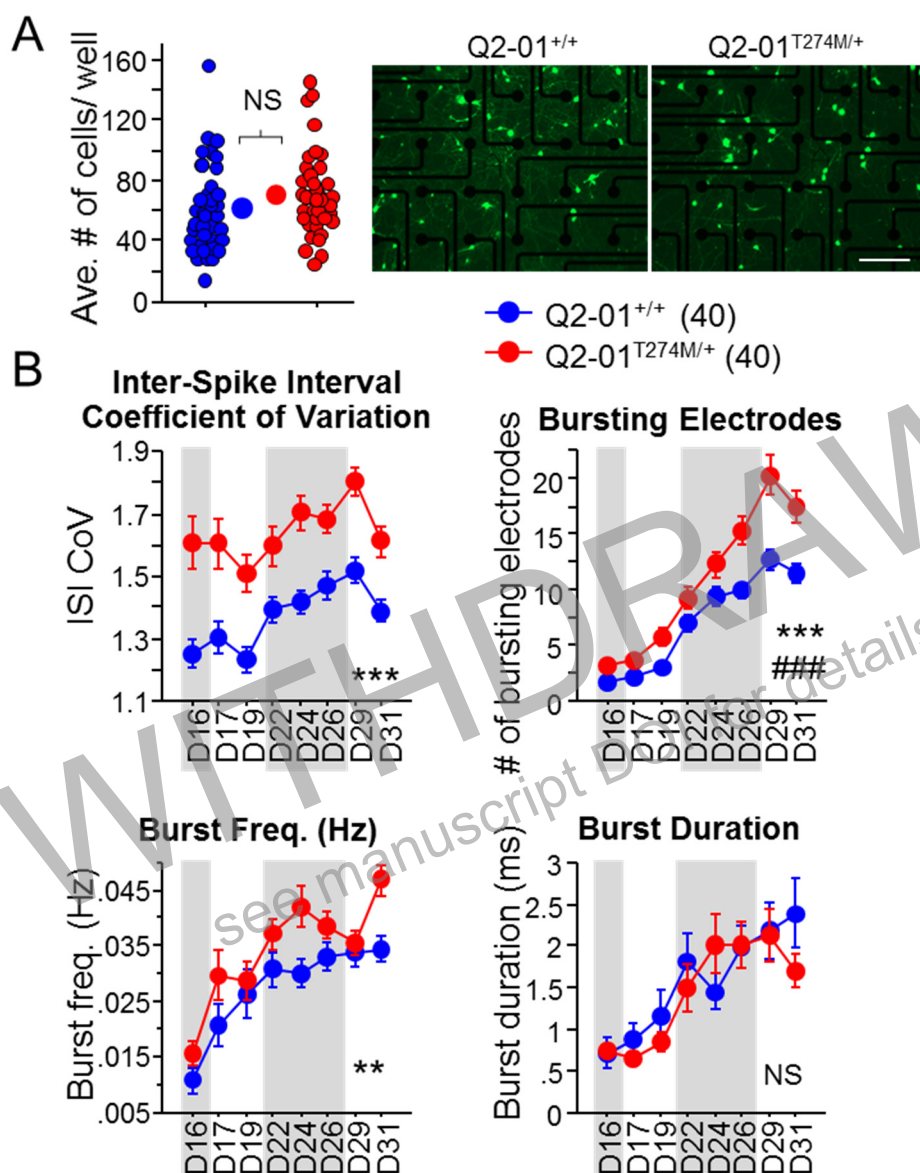

1277

1278 **Supplementary Figure 3. MEA quality control and bursting measurements, related to**  
 1279 **Figure 2. (A)** Each MEA plate well was imaged during week 4 in culture. GFP-fluorescing  
 1280 neurons on the electrode field area were counted for each well of every plate. The average  
 1281 number of cells per well was not different between Q2-01<sup>T274M/+</sup> patient-derived (71.1 ± 4.6  
 1282 neurons/well) and Q2-01<sup>+/+</sup> isogenic control (61.4 ± 4.3 neurons/well) wells ( $p = 0.1295$ ,  $N = 40$ ).  
 1283 Right: Representative images from which GFP-fluorescing cells were counted. Scale bar: 200  
 1284 μm. **(B)** The interspike interval coefficient of variation (ISI CoV) was significantly greater in  
 1285 patient-derived neurons (repeated measures ANOVA for genotype:  $F_{(1,546)} = 47.94$ ,  $***p < 0.0001$ ).  
 1286 The number of bursting electrodes was significantly greater in patient-derived neurons  
 1287 (repeated measures ANOVA for genotype:  $F_{(1,546)} = 18.82$ ,  $***p < 0.0001$ ; genotype/day  
 1288 interaction:  $F_{(7,546)} = 6.71$ ,  $###p < 0.0001$ ). The burst frequency was higher in patient-derived  
 1289 neurons (repeated measures ANOVA for genotype:  $F_{(1,546)} = 10.35$ ,  $**p = 0.0019$ ). However, the  
 1290 burst durations were not different between patient-derived and isogenic control neurons  
 1291 (repeated measures ANOVA for genotype:  $F_{(1,546)} = .289$ ,  $p = 0.592$ ; See Figure 2). NS: not  
 1292 significant. Number of neurons analyzed is displayed within the figure. Values displayed are  
 1293 mean ± SEM.

1294

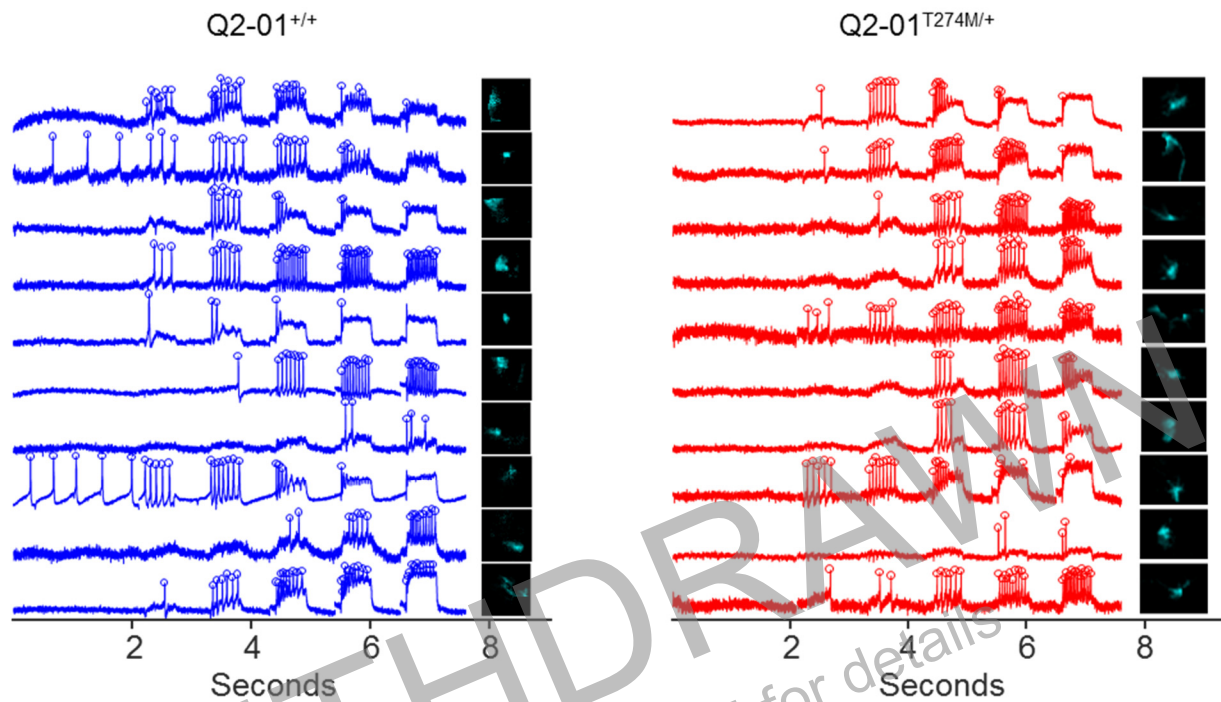

1295

1296

**Supplementary Figure 4: Representative traces of neuronal recordings in Optopatch**

**experiments.** Fluorescence-time traces showing detected spikes ( $\Delta F/F_0$ ; circles above spikes)

1298 and corresponding images of neurons for KCNQ2-NEE patient neurons (right) and isogenic

1299 controls (left).

1300

1301

1302

1303

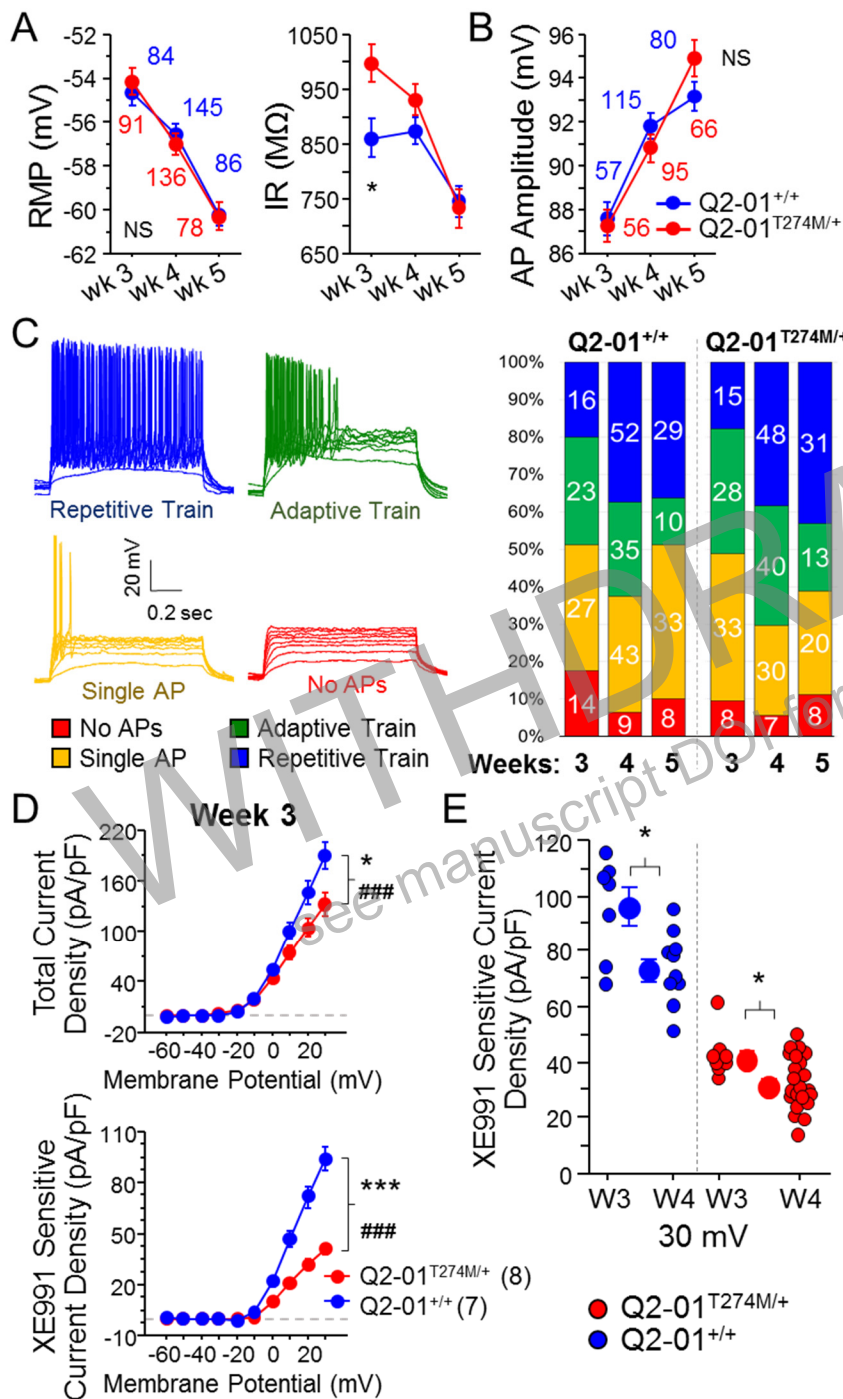

1304

1305

1306

1307

1308

1309

1310

1311

1312

1313

1314

1315

**Supplementary Figure 5. Intrinsic excitability by week in culture and M-current during week 3, related to Figures 3 and 5. (A)** Passive membrane properties. Left: Time course of resting membrane potential (RMP) and input resistance (IR) for iPSC-derived neurons in culture. As neurons matured over the 3-week period, the RMP became more hyperpolarized with no differences between cell lines, whereas IR became smaller over time in culture but was higher for patient neurons only during week 3 (Two-way ANOVA for input resistance measured at RMP:  $F_{(1,614)} = 5.54$ ,  $*p = 0.019$ ; t-test comparing isogenic control pair at week 3:  $*p = 0.0054$ ; week 4:  $p = 0.132$ ; week 5:  $p = 0.759$ ). **(B)** Action potential amplitudes over time in culture. There were no differences between cell lines. **(C)** Qualitative analysis of neuronal firing patterns. At each time point in culture there was heterogeneity in the firing patterns exhibited by the neurons during a 1 sec somatic current stimulus (10-80pA) protocol. Neurons were grouped based on specific

1316 defined criteria: No APs; Single APs: at least 1 AP fired during any of the 10-80pA steps but no  
1317 more than 10 APs; Adaptive train: 11 or more APs; Repetitive train: 11 or more APs with at least  
1318 10 APs having amplitudes more than 85 mV from baseline. The percent of neurons that fell into  
1319 specific group for each time point and cell line is indicated within columns. **(D)** Outward current  
1320 measured during week 3 in culture recorded from patient-derived (red) or isogenic control (blue)  
1321 neurons. Quantification of total current density (top: repeated measures ANOVA for total current  
1322 density during week 3 by genotype:  $F_{(1,117)} = 4.7$ ,  $*p = 0.0493$ ; genotype/voltage step interaction:  
1323  $F_{(9,117)} = 6.57$ ,  $###p < 0.0001$ ), and XE991-sensitive current (bottom: repeated measures ANOVA  
1324 for M-current density during week 3 by genotype:  $F_{(1,117)} = 27.64$ ,  $***p = 0.0002$ ; genotype/voltage  
1325 step interaction:  $F_{(9,117)} = 36.99$ ,  $###p < 0.0001$ ). **(E)** Plot of M-current densities recorded at 30 mV  
1326 from all neurons during week 3 or week 4 ([Figure 1G](#)) Comparison between weeks was  
1327 significantly different for both groups of neurons (*t test* for isogenic controls neurons:  $*p = 0.015$ ,  
1328 patient-derived neurons:  $*p = 0.016$ ). NS: not significant. Number of neurons analyzed is  
1329 displayed within the figure and in [Table 1](#). Values displayed are mean  $\pm$  SEM.

1330  
1331  
1332  
1333  
1334  
1335  
1336  
1337  
1338  
1339  
1340  
1341  
1342  
1343  
1344  
1345  
1346  
1347  
1348  
1349  
1350  
1351  
1352  
1353  
1354  
1355  
1356  
1357  
1358

WITHDRAWN  
see manuscript DOI for details

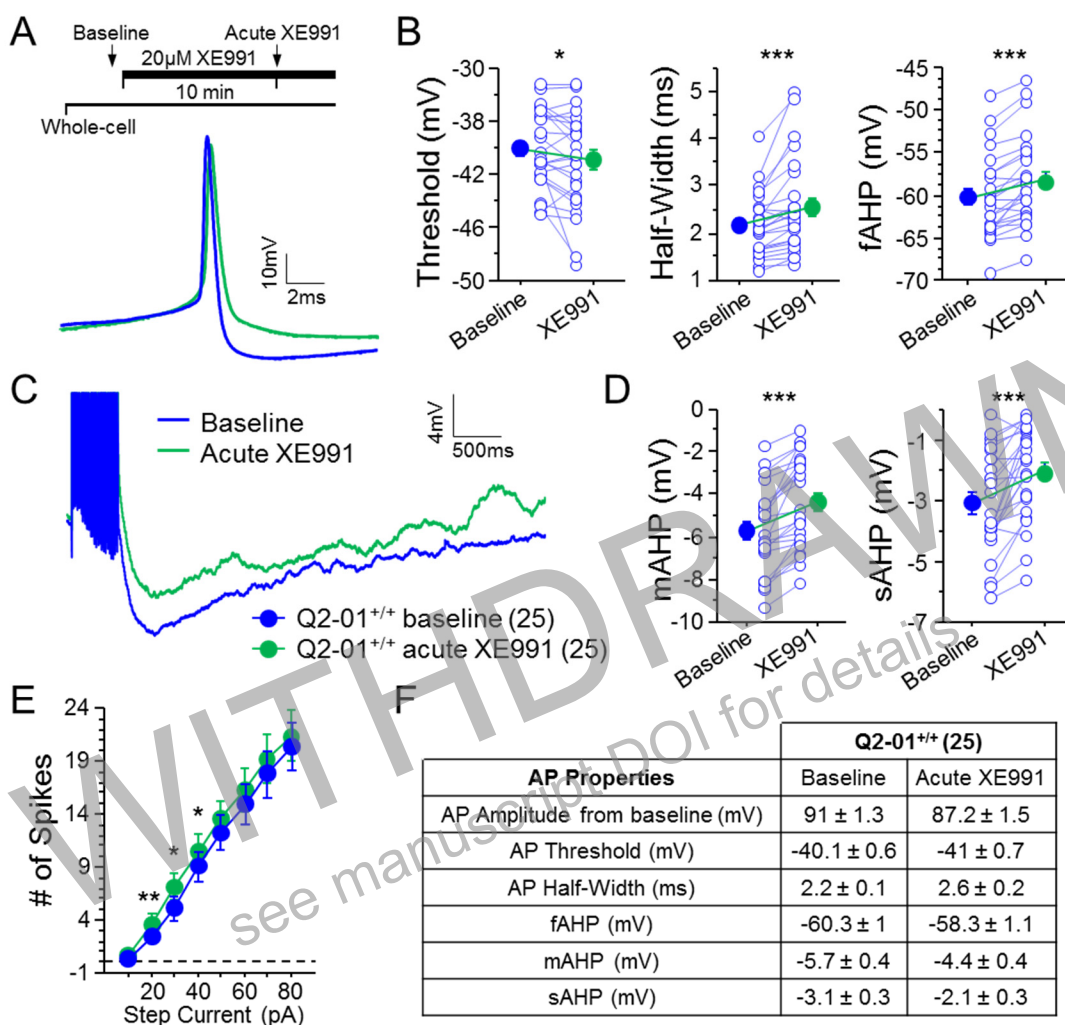

1359

1360

**Supplementary Figure 6. Acute inhibition of M-current in control neurons enhances excitability and decreases AP repolarization and post-burst AHP, related to Figures 6 and 7.**

1361 **(A)** Top: Experimental protocol. Baseline measures were made after establishing the whole-

1362 cell configuration in current-clamp mode. After exactly 10 min of continuous perfusion of 20 μM

1363 XE991 in aCSF, the AP properties, post-burst AHP and number of spikes fired per current

1364 stimulus were remeasured. Bottom: Representative whole-cell current-clamp recordings showing

1365 AP properties of isogenic control neurons during week 4 before (blue) and after (green) acute

1366 application of XE991. **(B)** Acute application of XE991 significantly decreased AP threshold ( $*p =$

1367 0.033), and reduced AP repolarization with longer AP half-width ( $***p = 0.0003$ ) and smaller fAHP

1368 ( $***p < 0.0001$ ). **(C)** Representative whole-cell current-clamp recordings showing post-burst

1369 AHPs before and after acute application of 20 μM XE991. **(D)** Acute application of XE991

1370 significantly reduced mAHP ( $***p < 0.0001$ ) and sAHP ( $***p = 0.0001$ ). **(E)** Number of APs fired

1371 by isogenic control neurons in response to 1 sec somatic current stimuli (10-80pA) from a holding

1372 potential of -65mV. Neurons were able to fire before and after acute application of 20μM XE991,

1373 but blocking M-currents resulted in an increase of APs fired only with 20 – 40pA current stimuli

1374 ( $p$ -value = 0.003, 0.048, 0.021; for 20, 30 and 40pA, respectively). **(F)** Summary of AP and AHP

1375 properties before and after XE991 application in isogenic control neurons during week 4.

1376 Repeated measures ANOVA was used to compare XE991 effects. N = 25 neurons, values

1377 displayed are mean ± SEM.

1378

1379

1380



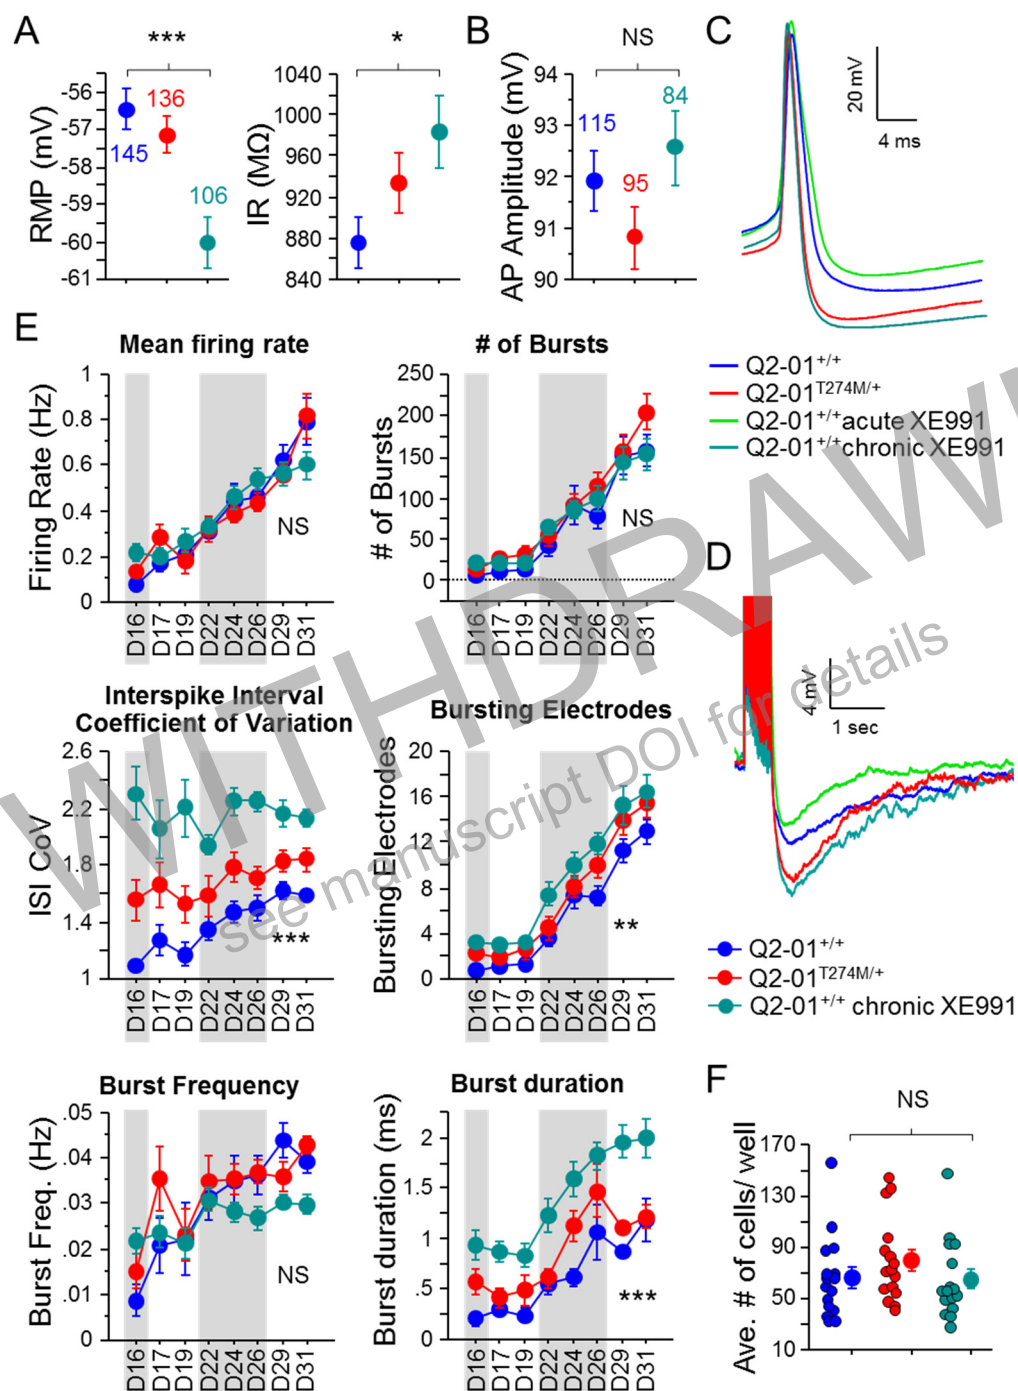

1381

1382 **Supplementary Figure 6. Effects of chronic XE991 treatment on control neuron intrinsic**  
 1383 **membrane properties and MEA recordings, related to Figure 6. (A)** Passive membrane  
 1384 **properties. Left: RMP became more hyperpolarized with chronic XE991 treatment (Q2-**  
 1385 **01<sup>+/+</sup>chronic XE991) in isogenic control neurons (ANOVA, Fisher's PLSD post hoc test:**  
 1386 **\*\*\**p*<0.0001). Right: Input resistance was greater in Q2-01<sup>+/+</sup>chronic XE991 neurons compared**  
 1387 **to Q2-01<sup>+/+</sup> (ANOVA, Fishers PLSD post hoc test: \**p*=0.0114). Number of neurons analyzed is**  
 1388 **displayed within the figure and in Tables 1 and 2. (B)** Action potential amplitudes were not  
 1389 **different between cell lines and after chronic treatment with XE991 (See Figure 7). (C)**  
 1390 **Representative AP traces from patient-derived neurons, isogenic control neurons, and control**  
 1391 **neurons chronically or acutely treated with 1 or 20 μM XE991, respectively. (D)** Representative  
 1392 **traces showing post-burst AHPs of patient-derived neurons, isogenic control neurons, and control**

1393 neurons chronically or acutely treated with 1 or 20  $\mu\text{M}$  XE991, respectively. (E) Longitudinal  
1394 analysis of MEA recordings from patient-derived neurons (Q2-01<sup>T274M/+</sup>) and isogenic control  
1395 neurons, which were either not treated (Q2-01<sup>+/+</sup>) or treated chronically with 1 $\mu\text{M}$  XE991 starting  
1396 on day 12. There was no difference in mean firing frequency or number of bursts fired by control  
1397 neurons chronically treated or not treated with XE991. However, the interspike interval coefficient  
1398 of variation (ISI CoV) was significantly higher in Q2-01<sup>+/+</sup> chronic XE991 neurons as compared to  
1399 both patient-derived neurons and isogenic control neurons (repeated measures ANOVA:  
1400  $F_{(2,315)}=50.15$ , \*\*\* $p<0.0001$ ). The number of bursting electrodes was significantly greater in Q2-  
1401 01<sup>+/+</sup> chronic XE991 neurons as compared to untreated isogenic controls (repeated measures  
1402 ANOVA:  $F_{(2,315)}=6.08$ , \*\* $p=0.0046$ ; Fisher's PLSD:  $p=0.0011$ ). While the burst frequency was not  
1403 different between groups (repeated measures ANOVA:  $F_{(2,315)}=2.75$ ,  $p=0.0752$ ), the burst  
1404 duration was significantly longer in Q2-01<sup>+/+</sup> chronic XE991 neurons (repeated measures ANOVA:  
1405  $F_{(2,315)}=39.68$ , \*\*\* $p<0.0001$ ). 16 wells were analyzed per genotype treatment group from 2  
1406 independent differentiations (See [Figure 7](#)). (F) Each MEA plate well was imaged during week 4  
1407 in culture. GFP-fluorescing neurons on the electrode field area were counted for each well of  
1408 every plate. The average number of cells per well counted was not different between Q2-01<sup>T274M/+</sup>  
1409 patient-derived neurons (80.3 $\pm$ 8.2 neurons/well), Q2-01<sup>+/+</sup> isogenic control neurons (66.8 $\pm$ 8  
1410 neurons/well) and Q2-01<sup>+/+</sup> chronic XE991 neurons (65.3 $\pm$ 7.6 neurons/well) wells ( $p=0.3469$ ). NS:  
1411 not significant. Values displayed are mean  $\pm$  SEM.

1412

1413

1414

1415

1416

1417

1418

1419

1420

1421

1422

1423

1424

1425

1426

1427

1428

1429

1430

1431

1432

1433

1434

1435

1436 **SUPPLEMENTARY TABLES:**

1437 **Supplementary Table 1. Single guide RNA off targets, related to Figure 1 and**  
 1438 **Supplementary Figure 1.**

|                                                     |                                                                                                                                                                                |
|-----------------------------------------------------|--------------------------------------------------------------------------------------------------------------------------------------------------------------------------------|
| <b>Single Guide RNA (sgRNA) KCNQ2</b>               | 5' CAGATCATGCTGACCACCATTGG 3'                                                                                                                                                  |
| <b>Donor Single Stranded Repair Oligonucleotide</b> | 5'-AGTCGCCAGCGGGCGTCCAGCCTGCCCTCAGGGGTGTGAGCAGGCCCTTCGTGTGAC TAGAGCCTGCGGTCCCACAGATCACGCTGACCACCTATTGGCTACGGGGACAAGTACCCC CAGACCTGGAACGGCAGGCTCCTTGC GGCAACCTTCACCCTCATCGG -3' |

1439

| Off Target Sequence<br>CAGATCATGCTGACCACCATTGG              | Score | Gene Locus                                     | PCR primer set |                               | Size (bp) | Sequencing Primers |                           |
|-------------------------------------------------------------|-------|------------------------------------------------|----------------|-------------------------------|-----------|--------------------|---------------------------|
| CAGATCA <u>C</u> GCTGACCACCATTGG                            | 100   | KCNQ2<br>NM_172107<br>chr20:-62071037          | F              | AACTAAGCACAACC<br>CCTGGG      | 1150      | F                  | GCCATGGCTCGG<br>TGGAGA    |
|                                                             |       |                                                | R              | TCTGCAGGCCCATC<br>TTGAAG      |           | R                  | TGAAGGGCACAC<br>AGTGAAGG  |
| CAGATCATG <u>A</u> TGACCACCA <u>G</u> CAG                   | 3.3   | KCNT1<br>NM_020822<br>chr9:-138651650          | F              | GCACACATATATTC<br>ACAAACATGGC | 842       | F                  | ACACACACATGA<br>ATGCTCGTG |
|                                                             |       |                                                | R              | GGACAAGAGAAGG<br>GAACTCACA    |           | R                  | AAATGAAGGACC<br>TGCTCCGT  |
| CAGATCA <u>C</u> ACTG <u>G</u> CCACCATTGG                   | 0.6   | KCNQ3<br>NM_004519<br>chr8:-133186572          | F              | CCTGGCTGTGGAT<br>GGGAAAT      | 867       | F                  | CTGTCCACCTTG<br>ACCCTTCC  |
|                                                             |       |                                                | R              | ATCCCCTGCTCCCA<br>GAGAAT      |           | R                  | CCAGGGACCTAG<br>GAGAGAGC  |
| C <u>A</u> C <u>A</u> CCATGCTGAC <u>G</u> ACCATGAG          | 0.8   | KIR2DL3<br>NM_015868<br>chr19:-55250012        | F              | GACGTCTTTTGAGT<br>CTGGTCCG    | 328       | F                  | GCCATGGCTCGG<br>TGGAGA    |
|                                                             |       |                                                | R              | ATCTCCATCCCCGC<br>ACT         |           | R                  | TGAAGGGCACAC<br>AGTGAAGG  |
| C <u>T</u> GATCATG <u>A</u> A <u>G</u> ACCACCA <u>G</u> GGG | 0.4   | TMEM248<br>NM_017994<br>chr7:-66406902         | F              | CTGTTGGCAAGTCA<br>GTCCTTG     | 297       | F                  | ACACACACATGA<br>ATGCTCGTG |
|                                                             |       |                                                | R              | TATATGGCAAGCCA<br>CAGGGTG     |           | R                  | AAATGAAGGACC<br>TGCTCCGT  |
| CAGA <u>A</u> CATGCTGACCAC <u>A</u> A <u>G</u> GGG          | 0.3   | MAST3<br>NM_015016<br>chr19:-18241435          | F              | CAGCGCTTTGCCAT<br>CAAGAAG     | 270       | F                  | CTGTCCACCTTG<br>ACCCTTCC  |
|                                                             |       |                                                | R              | ACAGAACAGACCTC<br>AACTTGGT    |           | R                  | CCAGGGACCTAG<br>GAGAGAGC  |
| <u>A</u> <u>A</u> <u>G</u> TCAT <u>C</u> CTGACCACCATAAG     | 1.6   | Intronic/<br>Intergenic<br>chr11:-44370967     | F              | AGCTCTGGAAAGCT<br>GCCTTATC    | 204       | F                  | GCCATGGCTCGG<br>TGGAGA    |
|                                                             |       |                                                | R              | GAGACAGTCCAAGA<br>CGTGGC      |           | R                  | TGAAGGGCACAC<br>AGTGAAGG  |
| C <u>A</u> CAT <u>C</u> T <u>G</u> GTGACCACCATCAG           | 1.6   | Intronic/<br>Intergenic<br>chr11:<br>115764718 | F              | GGTCTTGGCATGCC<br>TTTCTG      | 207       | F                  | ACACACACATGA<br>ATGCTCGTG |
|                                                             |       |                                                | R              | TCTGTCTTCCAACC<br>CTGGCT      |           | R                  | AAATGAAGGACC<br>TGCTCCGT  |
| CAG <u>I</u> A <u>T</u> ATGCTGACCAC <u>C</u> TTAG           | 1     | Intronic/<br>Intergenic<br>chr2:-26065149      | F              | GAACACAGAACACT<br>ACAACAACT   | 277       | F                  | CTGTCCACCTTG<br>ACCCTTCC  |
|                                                             |       |                                                | R              | AGGTAGTAAAGTGT<br>GAATCATCAGA |           | R                  | CCAGGGACCTAG<br>GAGAGAGC  |

1440

1441

1442

1443 **Supplementary Table 2: RT-qPCR primers, related to Supplementary Figure 2**

1444

|                       | NCBI Gene ID | Gene Target                | Primer 5'->3' Sequence |                          | Size (bp) | Source                     |
|-----------------------|--------------|----------------------------|------------------------|--------------------------|-----------|----------------------------|
| Neuronal Markers      | 2290         | FOXP1                      | F                      | ATACTGTGGTCATATGCCCGTG   | 165       | E.K.                       |
|                       |              |                            | R                      | AGCCTTTGAATTCCTATAAGTTGA |           |                            |
|                       | 5454         | POU3F2/ BRN2               | F                      | TGGATTCCCATCAGGAAAGAGG   | 170       | E.K.                       |
|                       |              |                            | R                      | AAAATCCCCCAAACGGCAA      |           |                            |
|                       | 33427        | vGLUT2                     | F                      | GGGAGACAATCGAGCTGACG     | 156       | E.K.                       |
|                       |              |                            | R                      | TGCAGCGGATACCGAAGGA      |           |                            |
| KCNQ2 Splice Variants | 3785         | KCNQ2 Var 1<br>NM_172107.3 | F                      | TACGGGGCCTCCAGACTTAT     | 129       | D.S.                       |
|                       |              |                            | R                      | GCACGGGCTGCCTTTACTTG     |           |                            |
|                       | 3785         | KCNQ2 Var 2<br>NM_172106.2 | F                      | CGCAAACCTCAAACCTACGGG    | 139       | D.S.                       |
|                       |              |                            | R                      | CTGACCTTCTGGCTTGGAGA     |           |                            |
|                       | 3785         | KCNQ2 Var 3<br>NM_004518.5 | F                      | GCACTTTGAGAAGAGGCGGA     | 144       | D.S.                       |
|                       |              |                            | R                      | ATAAGTCTGTACATGGGCACG    |           |                            |
|                       | 3785         | KCNQ2 Var 4<br>NM_172108.4 | F                      | ACGGCAGAACTCAGAAGCAAG    | 155       | D.S.                       |
|                       |              |                            | R                      | TGAACTTCCGCTTGGACACC     |           |                            |
|                       | 3785         | KCNQ2 Var 5<br>NM_172109.2 | F                      | GCCTGGAGATTCTACGCCAC     | 123       | D.S.                       |
|                       |              |                            | R                      | TTGCTTGGTGGCAGGTG        |           |                            |
| House keeping         | 5080         | GAPDH                      | F                      | ACAACCTTTGGTATCGTGGAAGG  | 101       | PrimerBank:<br>378404907c2 |
|                       |              |                            | R                      | GCCATCACGCCACAGTTTC      |           |                            |
|                       | 2821         | GPI (F1/R1)                | F                      | GTGTACCTTCTAGTCCC GCC    | 101       | G.L.R.                     |
|                       |              |                            | R                      | GGTCAAGCTGAAGTGGTTGAAGC  |           |                            |

1445

1446
